# Supplementary material
Source: PubMed Central journal article supplement (PMC4928716)
Supplement: NIHMS795262-supplement-Supplemental_1.pdf [file NIHMS795262-supplement-Supplemental_1.pdf]

# HIV-host interactome revealed directly from infected cells

Y Luo, EY Jacobs, TM Greco, KD Mohammed, T Tong, S Keegan, JM Binley, IM Cristea, D Fenyő, MP Rout, BT Chait & MA Muesing

## Supplementary Figures and Tables

**Supplementary Figure 1.** Foreign epitope-tagged viruses are stable and without reversion over extended periods of outgrowth in culture.

**Supplementary Figure 2.** Although the immunoreactivity of the 3xFLAG tag is mainly restricted to the ER, the intracellular distribution of the tagged Env glycoprotein is not perturbed by 3xFLAG tag insertion.

**Supplementary Figure 3.** Immunoreactivity of the 3xFLAG epitope in Env-3xF infected CEM cells is diminished near the cell surface but present at points of syncytial contact between cells.

**Supplementary Figure 4.** The 3xFLAG epitope exhibits distinct immunoreactivity patterns during the early and late stages of infection.

**Supplementary Figure 5.** Foreign insertion within Env does not disrupt its overall glycosylation profile in infected producer cells.

**Supplementary Figure 6.** Neither the five amino acid (PmeI) nor the 35 amino acid 3xFLAG insertion disrupt the amount, stoichiometry or quality of the Env subunits incorporated into Env-3xF virions.

**Supplementary Figure 7.** Schematic diagram of I-DIRT MS methodology.

**Supplementary Figure 8.** Analysis of anti-FLAG affinity purified and natively eluted glycoprotein from Env-3xF infection.

**Supplementary Figure 9.** Construction and characterization of a set of HIV-1 indicator viruses.

**Supplementary Figure 10.** Insertion of 3xFLAG tag alters the mode of viral transmission.

**Supplementary Figure 11.** Schematic flow charts: TOR1AIP2 (LULL1); Env-mediated perturbation of host interactor NOTCH1.

**Supplementary Figure 12.** Detail of the I-DIRT ratios for the forward and reverse I-DIRT affinity isolations for the 3xFLAG-tagged HIV-1 Env protein.

**Supplementary Figure 13.** Detail of the I-DIRT ratios for the forward and reverse I-DIRT affinity isolations for the 3xFLAG-tagged HIV-1 Vif protein.

**Supplementary Figure 14.** Venn diagram comparison of Vif and Env host protein interactions identified by these analyses and that of Jäger et al.

**Supplementary Figure 15.** Comparison of the Vif and Env cellular interactors identified from cycling infection (Luo et al.) or from ectopic expression of individual viral proteins (Jäger et al.).

**Supplementary Figure 16.** Comparison cellular interactors identified by individualized ectopic expression of Vif and Env proteins (Jäger et al.) or from cycling viral infection (Luo et al.).

**Supplementary Figure 17a-c.** Raw data presentation.

**Supplementary Table 1.** Env host interactions: list of proteins classified as specific Env interactions by I-DIRT proteomic analysis.

**Supplementary Table 2.** Vif host and viral interactions: list of proteins classified as specific Vif interactions by I-DIRT proteomic analysis.

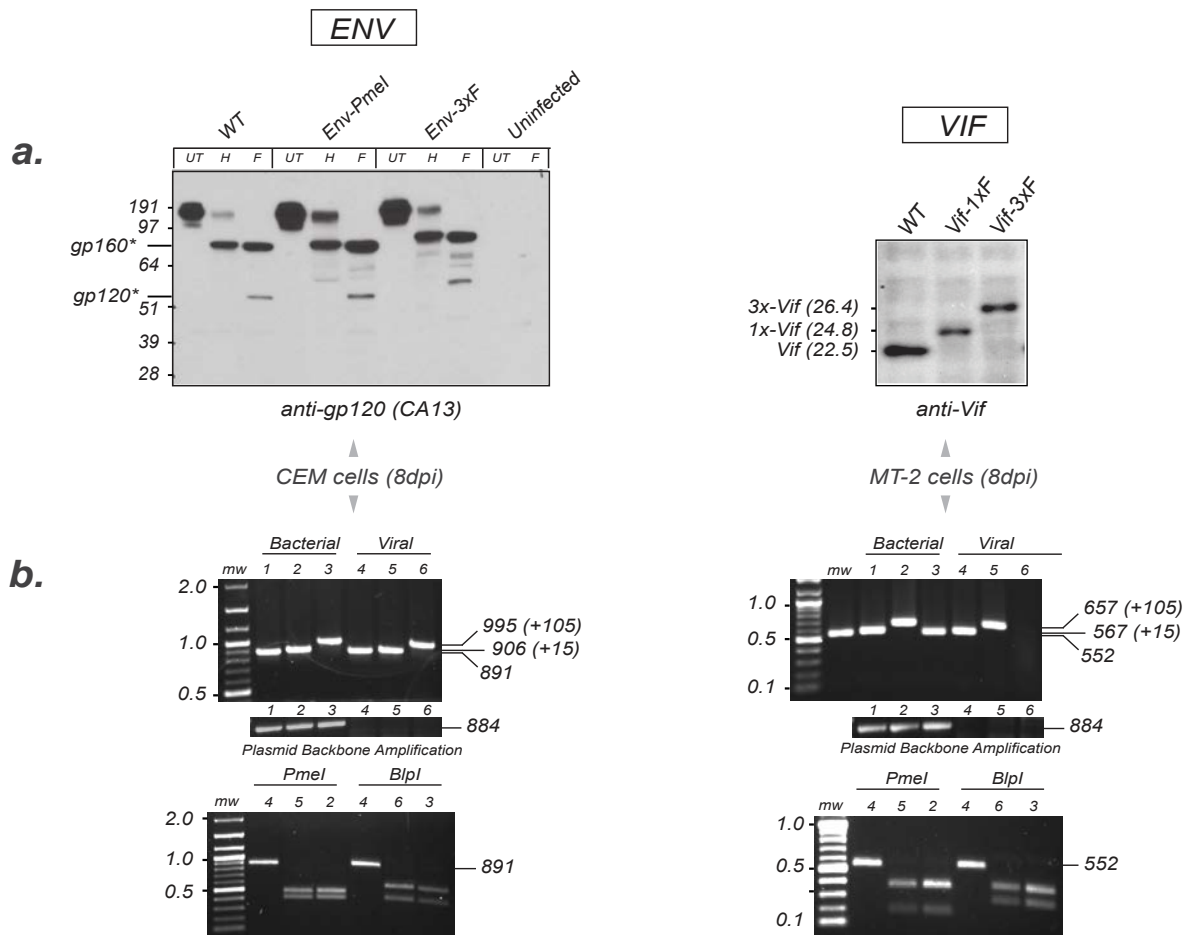

**Supplementary Figure 1. Foreign epitope-tagged viruses are stable and without reversion over extended periods of outgrowth in culture.**

**a.** Western blot analysis of total lysate from infected cell cultures harvested ten days post infection (dpi) using antibodies against common epitopes of Env or Vif show no reduction in molecular weight of the tagged proteins. CEM cells were infected with untagged, Env-PmeI-inserted, Env-3xF viruses or left uninfected. Size differences of the gp160 Env proteins in the lysate before (untreated; UT) or after digestion with endonuclease H (H) or PNGaseF glycosidase digestion (F), the latter removing all N-linked glycans, were resolved in the upper left panel. The predicted molecular weight for deglycosylated WT gp160 (gp160\*) and gp120 (gp120\*) is 97.2 and 57.7 kDa, respectively and 101.2 kDa and 61.6 kDa for the 3xFLAG-tagged Env versions. Similarly, Vif restrictive MT-2 cells were infected with the untagged parental, Vif-1xF or Vif-3xF viral stocks. The calculated molecular weights of the WT and the modified Vif proteins are 22.5, 24.8 and 26.4 kDa, respectively. **b.** An alternative, confirmatory PCR assay based on the integrity of a specific gel mobility associated with tagged viral DNAs after extended rounds of infection also demonstrates the stability of the foreign insertions within Env- and Vif-tagged viruses. CEM (Env) or MT-2 (Vif) cells were independently infected with WT parental, Env-PmeI, Vif-PmeI, Env-3xF or Vif-3xF virus. After 12 days of viral outgrowth, total DNA was prepared from each infected culture, and cleaved with the bacterial DNA discriminating DpnI endonuclease prior to PCR amplification of the *vif* or *env* gene segment. Any residual bacterial DNA persisting in cells from the initial infection will be cleaved by the methylation-specific DpnI, resulting in the prevention of PCR amplification and contamination from DNA of bacterial origin. The resulting DNA fragments were either left uncut (top) or treated with restriction enzymes diagnostic with respect to the 15 base pair Tn7-mediated insertion (*PmeI*) or the 3xFLAG tag (*BlnI*) (bottom). For comparison, the proviral plasmid DNAs used to generate all viral stocks were amplified and treated as above. In addition, scoring for PCR amplification of a plasmid DNA backbone region confirms the absence of any bacterial plasmid DNA retained within the infected culture. Lane 1-3: PCR amplicon of proviral bacterial plasmid DNA; lane 4-6: PCR product of viral DNA 12 dpi; 1, 4: WT; 2, 5: 15 bp-inserted; 3, 6: 3xFLAG-tagged. Representative experiments were performed in duplicate.

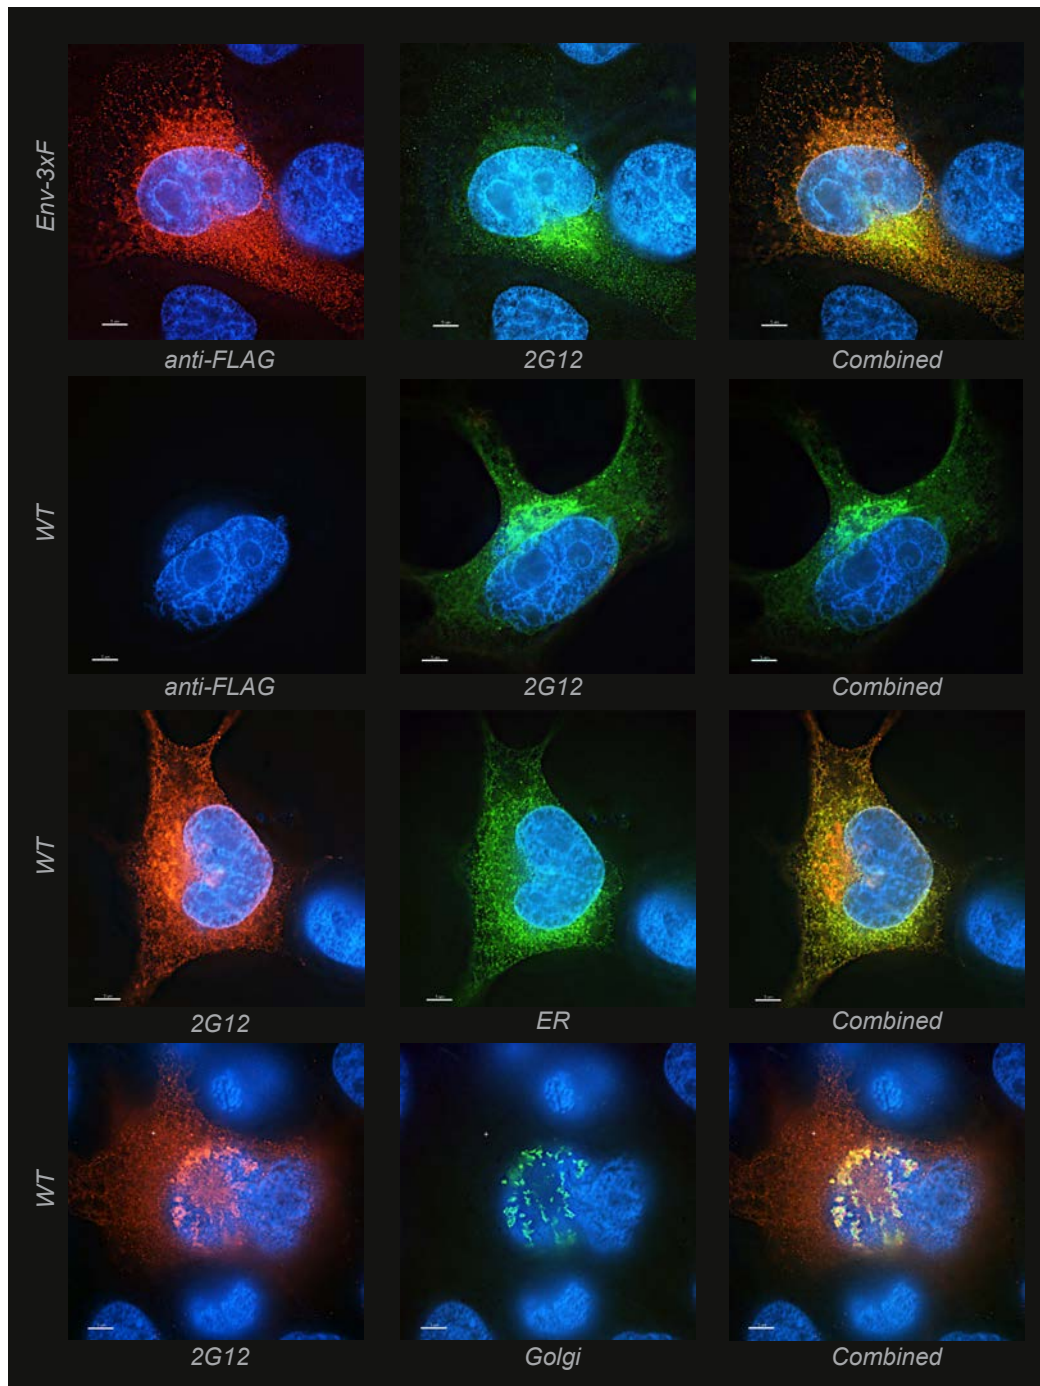

**Supplementary Figure 2.** Although the immunoreactivity of the 3xFLAG tag is mainly restricted to the ER, the intracellular distribution of the tagged Env glycoprotein is not perturbed by 3xFLAG tag insertion. HOS-CD4-Fusin cells were infected with the Env-3xF or WT virus and after an additional 48 hours of incubation, visualization of Env proteins performed by indirect immunofluorescence staining with anti-FLAG M2 followed by AlexaFluor 594 anti-mouse (red) or 2G12 followed by AlexaFluor 488 / 594 anti-human (green / red) secondary antibodies. Counterstaining for nuclear DNA was with Hoechst 33342 (blue). Baculoviruses encoding a specific fluorescent green probe (either CellLight ER-GFP or CellLight Golgi-GFP) were used to demarcate the boundaries of these organelles to confirm the global reactivity of the anti-Env 2G12 antibody. All images are representative of three independent experiments with almost all stained cells in the population illustrating the respective phenotype displayed. For all immunofluorescent studies shown, the bar denotes 5  $\mu$ m.

**a.**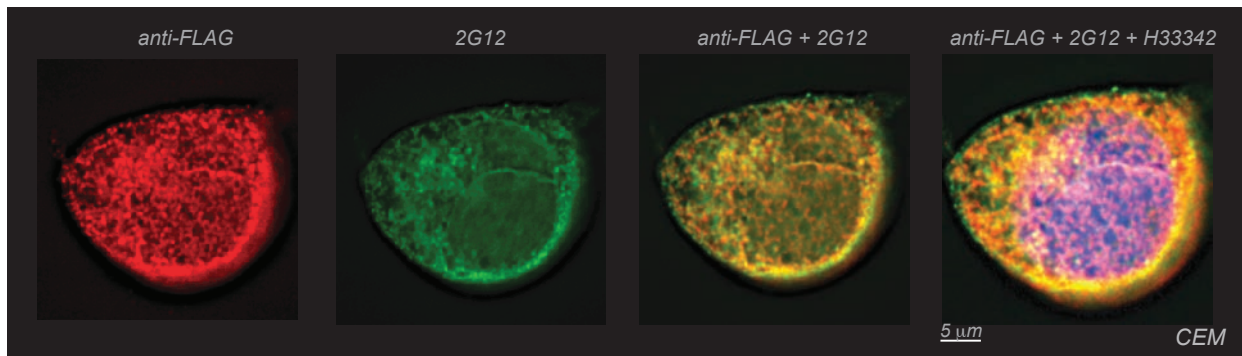**b.**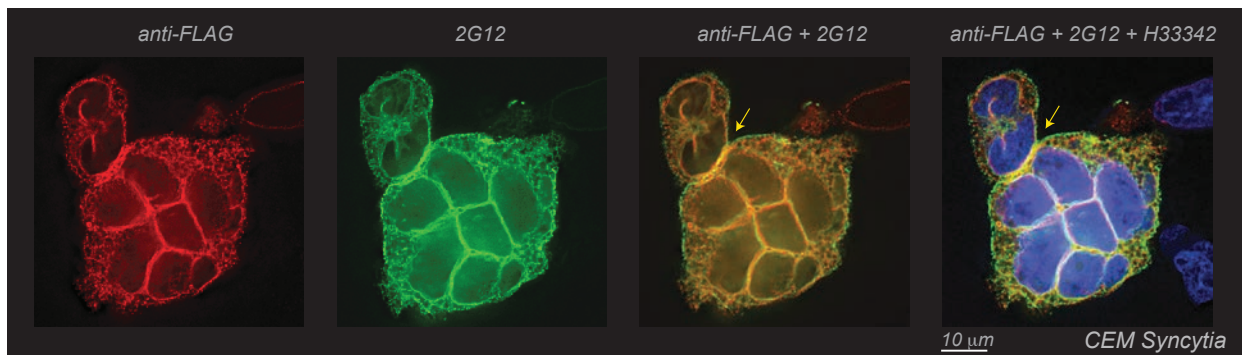

**Supplementary Figure 3. Immunoreactivity of the 3xFLAG epitope in Env-3xF infected CEM cells is diminished near the cell surface but present at points of syncytial contact between cells.** *a.* A single infected cell. *b.* Multinucleated syncytium of infected cells. Staining: anti-FLAG M2 followed by AlexaFluor 594 anti-mouse as secondary (red), 2G12 and AlexaFluor 488 anti-human (green), Hoechst 33342 counterstains nuclear DNA (blue). One slice from a set of deconvoluted set of 35 Z-sections is shown in both *a.* and *b.* The anti-FLAG staining pattern overlaps with that of 2G12 except for the outside perimeter of the cell. However, in the multinucleated syncytium (*b.*), the points of cell-cell contact appear reactive to both antibodies (i.e., yellow arrow). All images are representative of three independent experiments with almost all stained cells in the population illustrating the respective phenotype displayed. For all immunofluorescent studies shown, the bar denotes either 10 or 5  $\mu\text{m}$ .

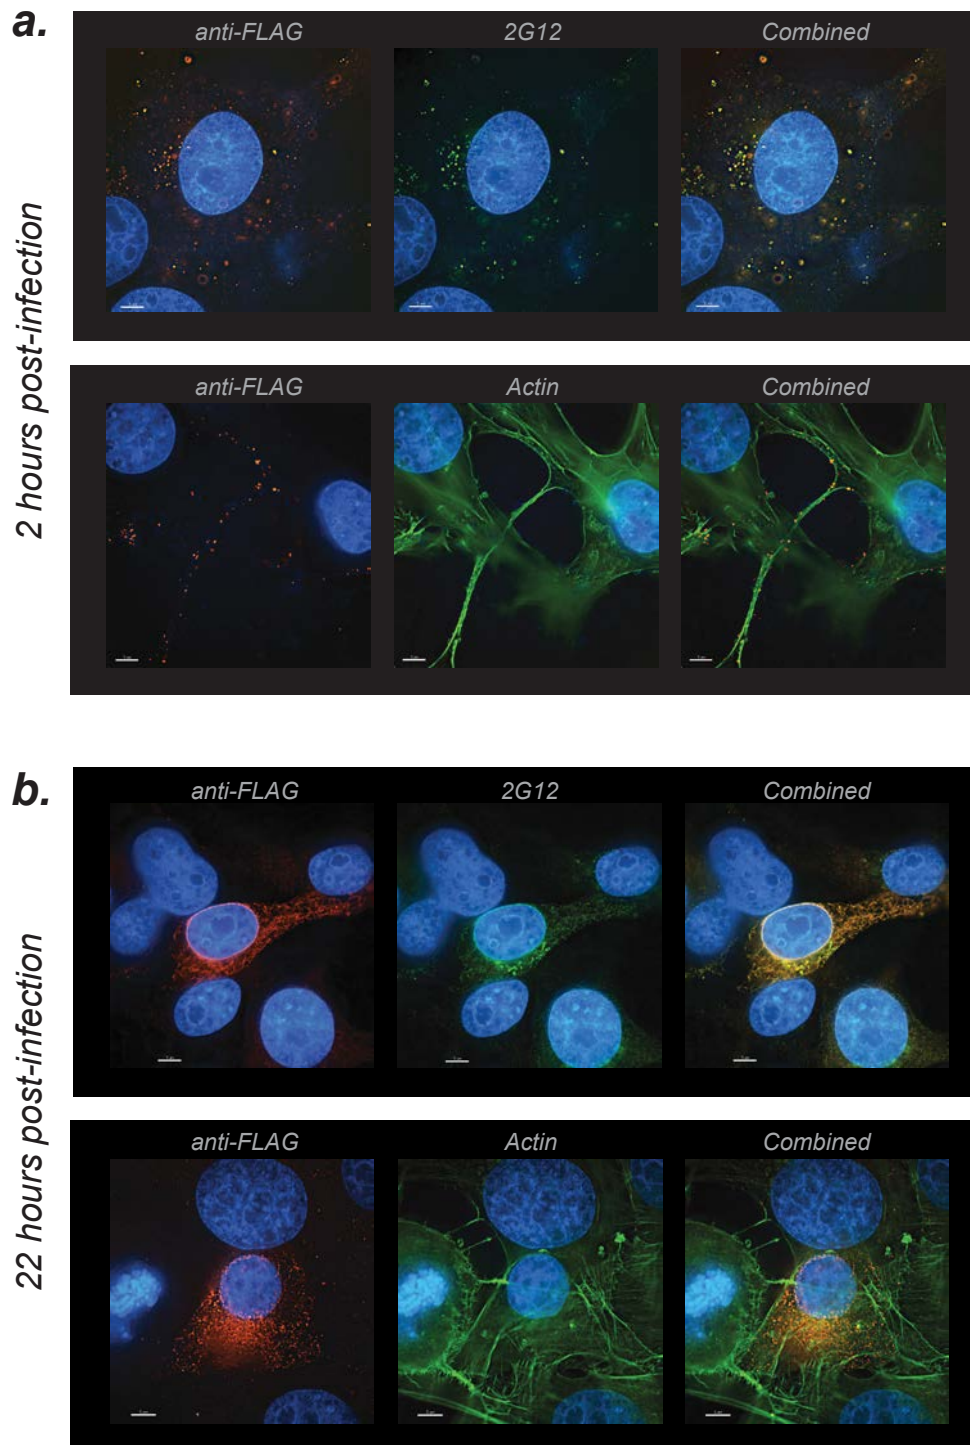

**Supplementary Figure 4. The 3xFLAG epitope exhibits distinct immunoreactivity patterns during the early and late stages of infection.** HOS-CD4-Fusin cells were infected with Env-3xF by spinoculation and cytochemically examined two different times after infection. **a.** 2 hpi, **b.** 22 hpi. Fluorescent staining conditions: anti-FLAG M2 mAb and AlexaFluor 594 anti-mouse secondary antibody (red), 2G12 and AlexaFluor 488 anti-human secondary antibody (green) or in a different set of experiments, green phalloidin stain for F-actin was used to assist in the determining of the location of the Env-3xF protein at each of the time points. All images are representative of three independent experiments with almost all stained cells in the population illustrating the respective phenotype displayed. For all immunofluorescent studies shown, the bar denotes 5 μm.

**TOTAL CELL LYSATE (CEM 8dpi)**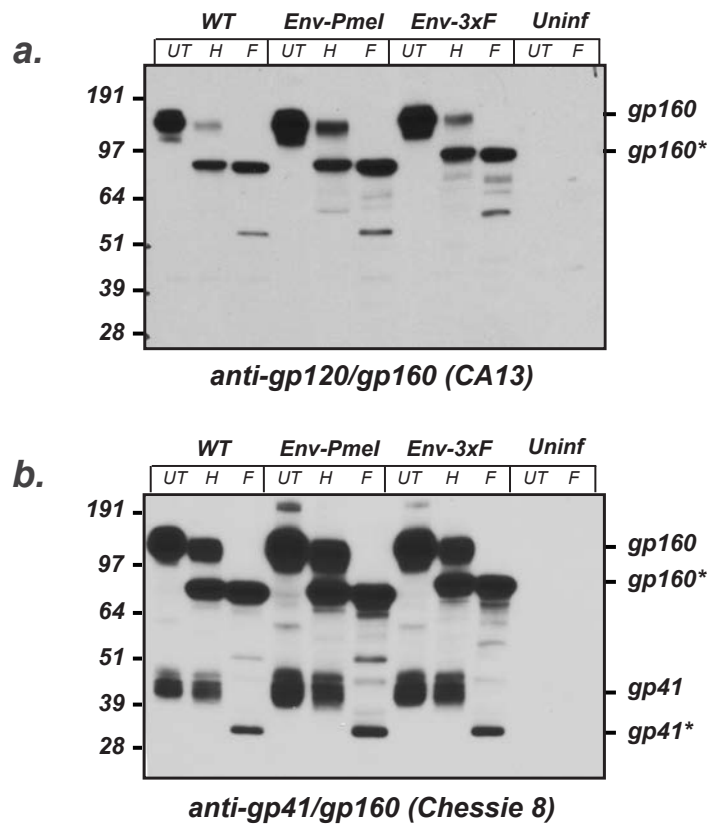

**Supplementary Figure 5. Foreign insertion within Env does not disrupt its overall glycosylation profile in infected producer cells.** Total cell lysates were prepared from CEM cultures infected with WT, Env-PmeI or Env-3xF at 8 dpi. An uninfected control cell lysate is also included. Samples were left untreated (UT) or incubated with either EndoH (H) or PNGaseF (F) glycosidase, then electrophoresed and probed in Western blot format using **a.** CA13 (ARP3119) specific for gp120 or **b.** Chessie 8 antibody that recognizes a gp41 epitope. (\*), indicates the mobility expected of the deglycosylated counterparts of the Env proteins. Representative experiments were performed in triplicate.

**VIRIONS**

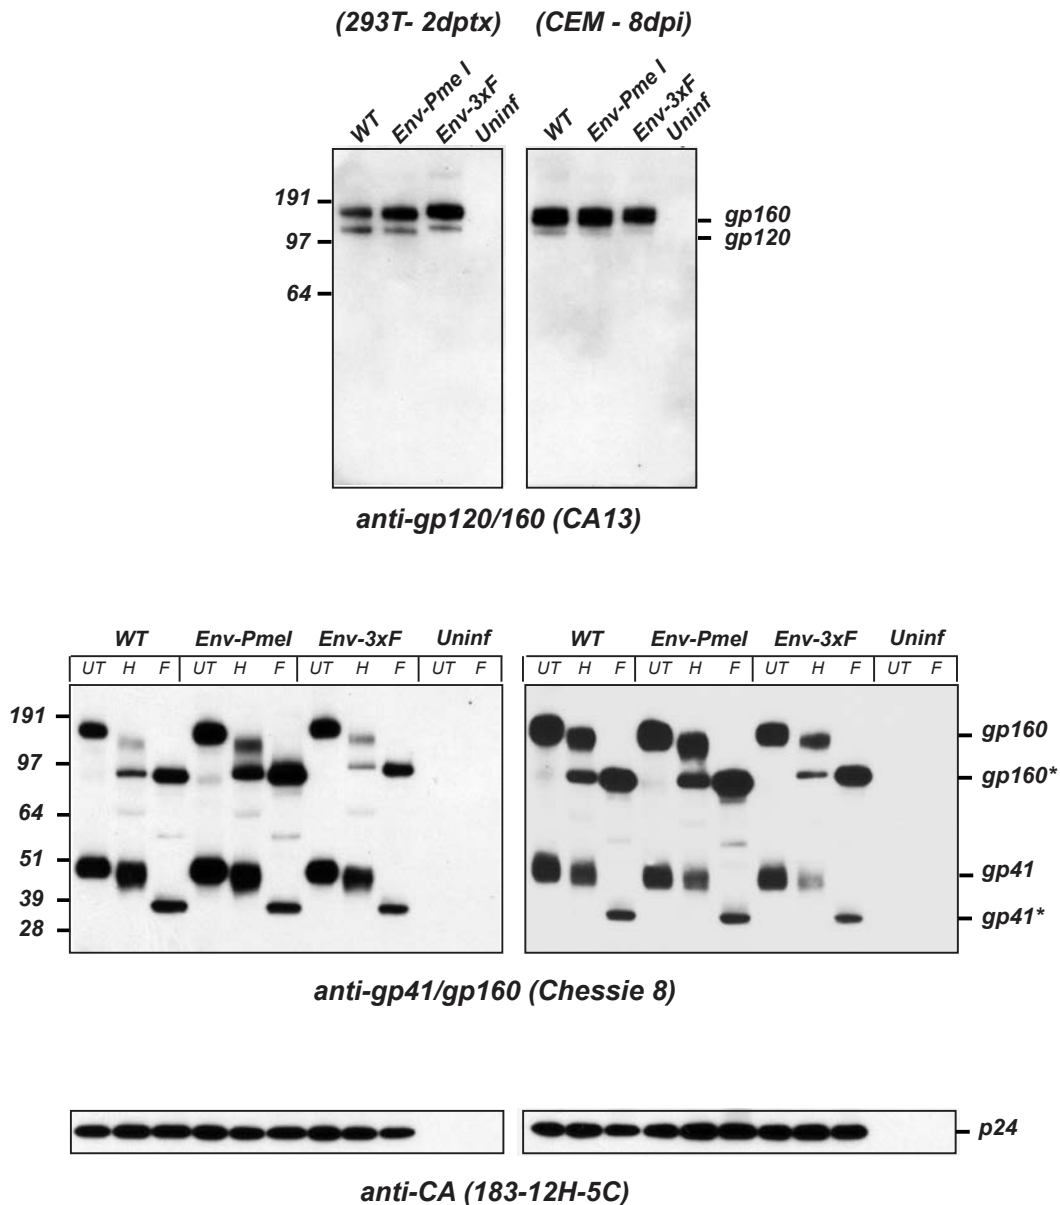

**Supplementary Figure 6. Neither the five amino acid (PmeI) nor the 35 amino acid 3xFLAG insertion disrupt the amount, stoichiometry or quality of the Env subunits incorporated into Env-3xF virions.** Viral particles were recovered and purified over sucrose from the supernatant of 293T cells transfected with the WT, Env-PmeI or Env-3xF proviral constructs (two days post-transfection, 2 dptx) or from the media of CEM cells infected with each of the respective viruses harvested 8 dpi. The virion preparations were normalized for p24 content and the samples were left untreated (UT) or incubated with either EndoH (H) or PNGaseF (F) glycosidase, electrophoresed and probed in Western blot format with antibodies specific for gp120, gp41 as in Supplementary Figure 5 or p24 (183-12H-5C). The ratio of gp160/gp120/gp41 normalized to p24 amount was comparable for all three viruses prepared from either transfected 293T or infected CEM cells. (\*), indicates the mobility expected for the deglycosylated counterparts of the Env subunits. Representative experiments were performed in triplicate.



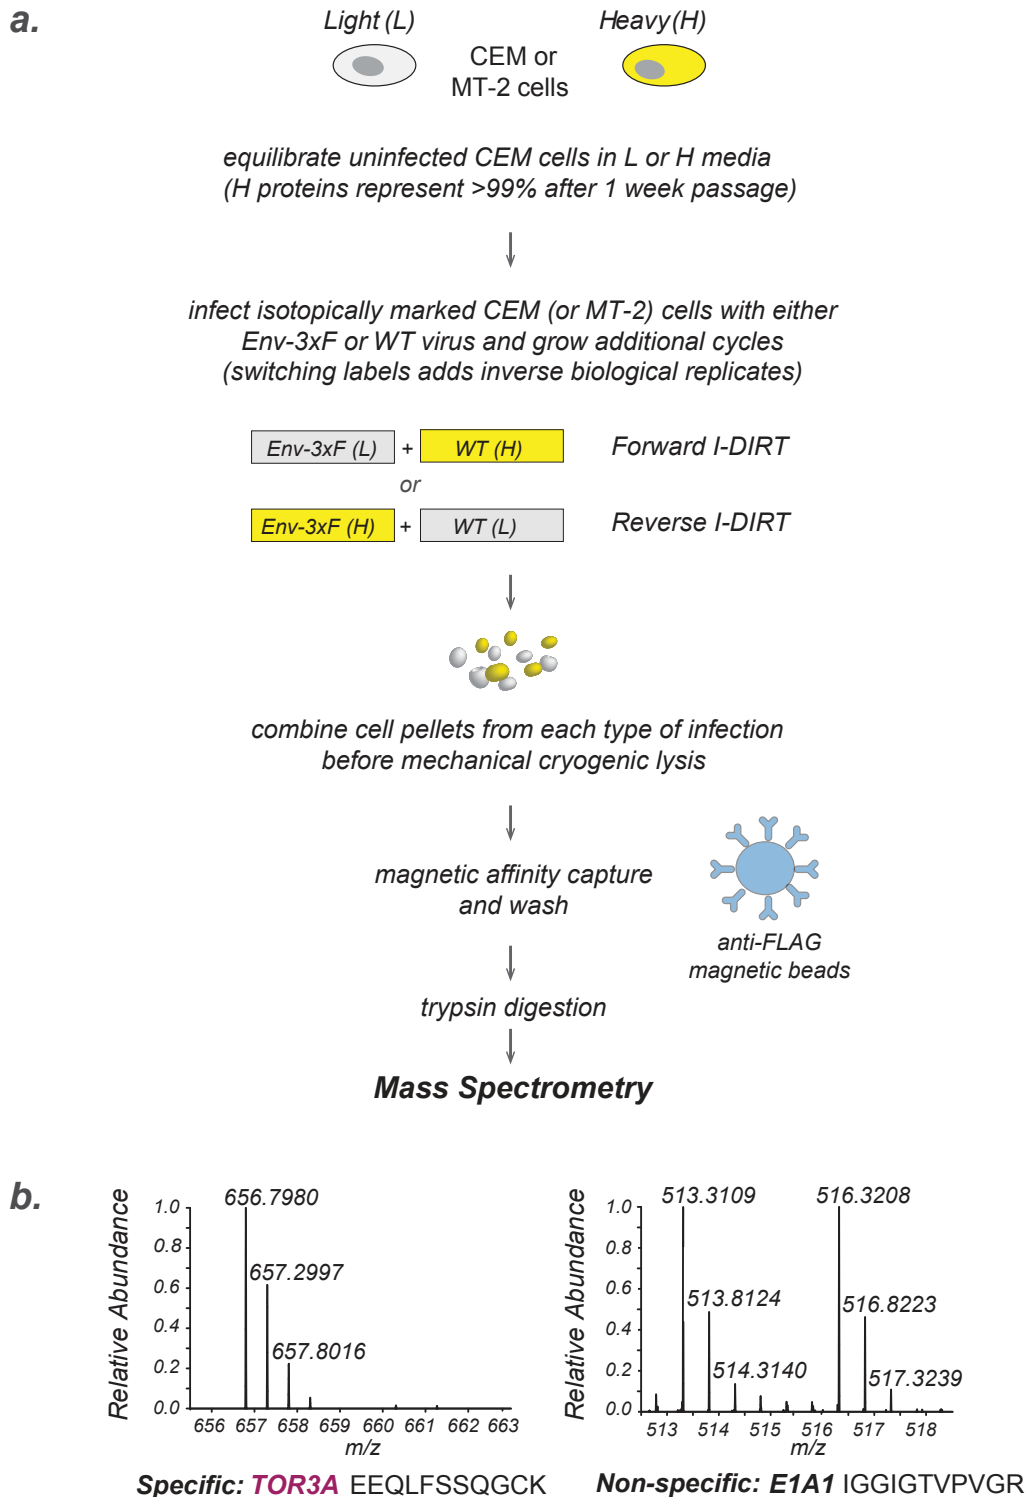

**Supplementary Figure 7. Schematic diagram of I-DIRT MS methodology.** *a.* The experimental flow of the technique is outlined. *b.* An example of the mass spectra of a peptide derived from a specific interacting protein (Tor3A) and from a non-specific interactor, E1A1. Proteins that exhibited high [L/(H+L)] ratios (or in the reverse isotope labeling, high [H/(H+L)]) were classified as specific interactions, while proteins with equal isotope incorporation were classified as nonspecific. The inclusion of a reverse isotope labeling experiment increased the robustness of the analysis, discriminated against possible exogenous contaminants and added an additional biological replicate.

**AFFINITY PURIFIED - NATIVELY ELUTED ENV  
(ENV-3xF INFECTED CEM CELLS- 8dpi)**

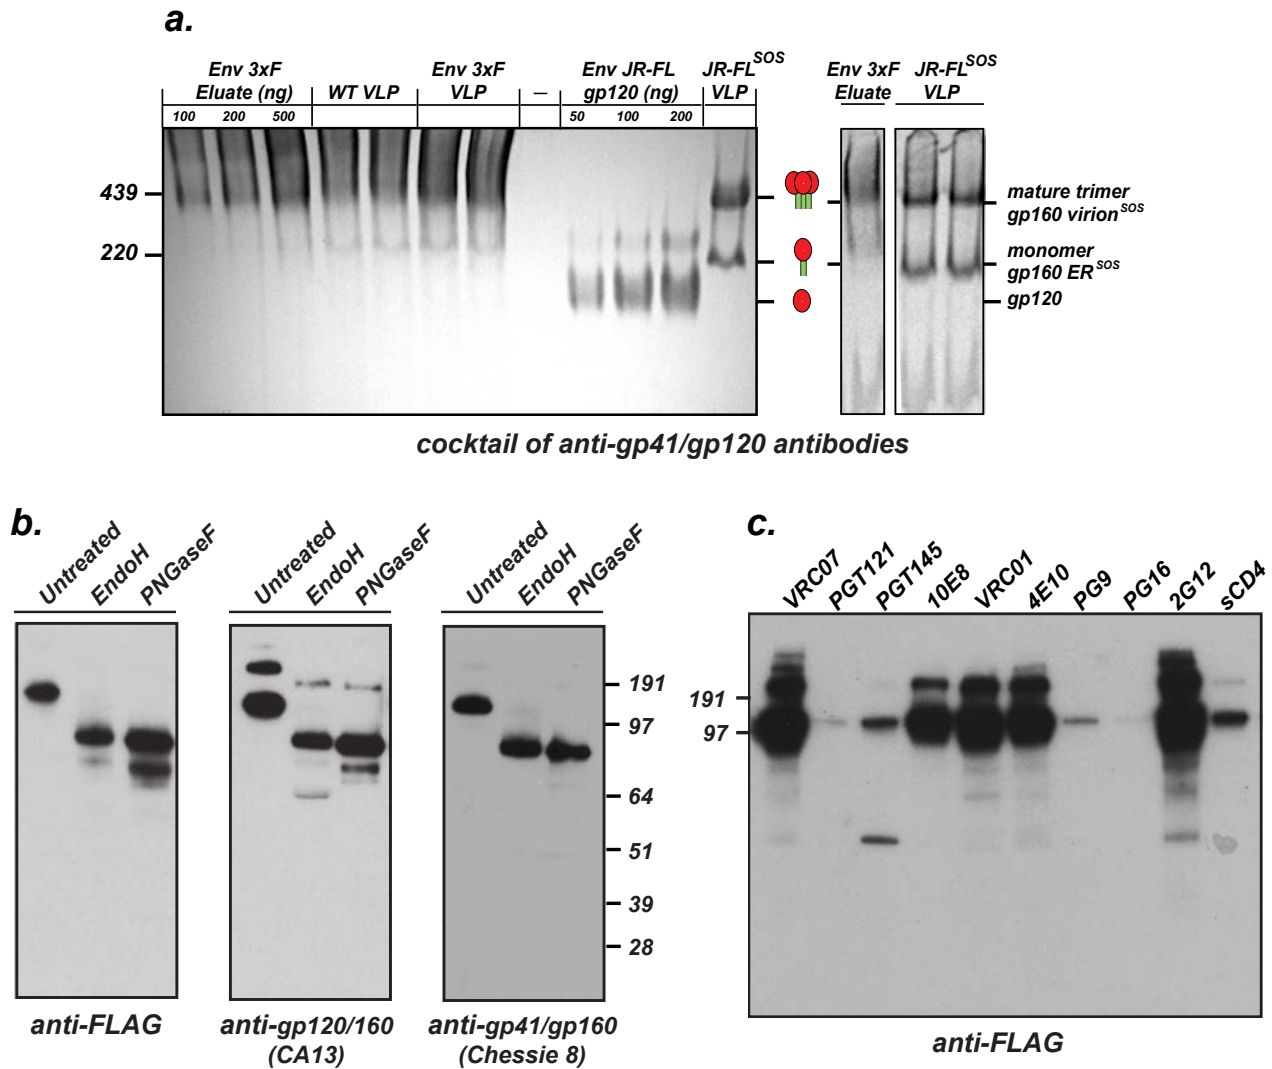

**Supplementary Figure 8. Analysis of anti-FLAG affinity purified and natively eluted glycoprotein from Env-3xF infection.** *a.* 3xFLAG peptide-eluted native Env protein recovered from Env-3xF infected cultures is predominantly trimerized, as shown by native gel electrophoresis probed with a cocktail of anti-gp41 and anti-gp120 antibodies (see Methods). The mobilities of purified gp120, monomeric and trimeric JR-FL Env SOS purified from VLPs (virus-like particles) control proteins are indicated. VLPs are pseudotyped with the indicated HIV-1 Env protein. *b.* Purified Env from Env-3xF infected cultures is proteolytically unprocessed and modified by high mannose addition but without further downstream glycosylation. Samples were left untreated or digested with the indicated endoglycosidase and probed in Western blot format as described in Supplementary Figures 5 and 6. *c.* The tagged Env trimer is recognized by a subset of bNAbs and soluble CD4 (sCD4-183, 2-domain) but not those antibodies that have epitopes near the site of 3xFLAG-tag insertion (amino acid 190, Figure 2A) or those that in part, require post-ER sugar modification for their recognition. The indicated antibody or sCD4 was individually covalently coupled to magnetic beads and incubated with the eluted Env overnight. The beads were then washed in binding buffer three times and the SDS eluted material electrophoresed and probed with anti-FLAG M2 antibody. Representative experiments were performed in duplicate.

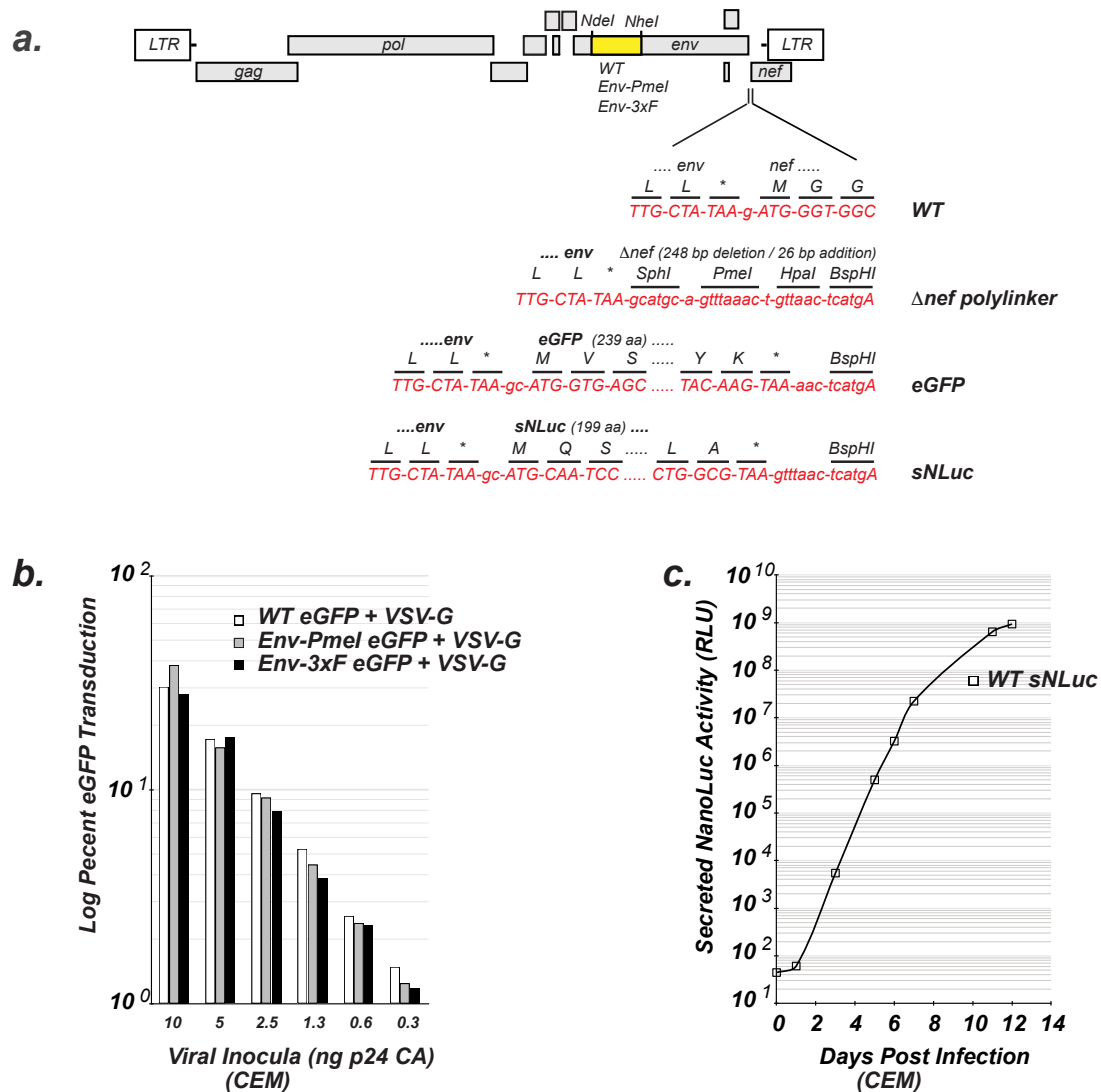

**Supplementary Figure 9. Construction and characterization of a set of HIV-1 indicator viruses.** *a.* Construction: enhanced green fluorescent (eGFP, Clontech) and secreted nanoluciferase (sNLuc, Promega) replication competent viral derivatives were constructed by first deleting 248 base pair (bp) of the nef gene coding region leaving the 3' LTR intact. The deletion was replaced by substitution with a 26 bp polylinker containing unique sites within the proviral DNA clone ( $\Delta$ nef polylinker), which was then used to accept the respective code for each of the small molecular weight indicator proteins. The DNA and amino acid sequences are shown for a small segment at the beginning and end of the eGFP and sNLuc derivatives. Both indicators utilize the natural ATG first codon of nef for the initiation of their translation. *b.* Single-step infection of WT, Env-PmeI and Env-3xF eGFP viral derivatives pseudotyped with the VSV-G Env ( $n=1$ ) are linear with respect to input virus and are equally infectious at low moi. These results were used for calibration of the amount of input virus used to initiate the VSV-G pseudotyped infections of the sNLuc viral derivatives described in Supplementary Figure 10B. *c.* Viral growth curve of the WT sNLuc virus using a non-invasive, sensitive assay. The assay has wide dynamic range and measures the extent of viral propagation over several cycles of outgrowth. Approximately 5 ng p24 of the WT virus was used to initiate infection of a 5 ml culture of  $1 \times 10^6$  CEM cells and after 1 hr incubation at 37° C the cells were washed three times in PBS, media added back, a 0 time point taken and the medium scored for sNLuc activity (RLU, relative light units) over the course of 12 days ( $n=1$ ). Although the growth curve is adjusted for the dilution of the culture from each split ratio over the course of the study, the dynamic range in terms of absolute RLU is  $4 \times 10^1$  (day 0) to  $10^7$  (day 12). Secreted nanoluciferase provides an easy assay particularly well suited for infected suspension cell cultures that exhibit extensive syncytia formation (i.e., CEM) confounding accurate monitoring of viral growth.

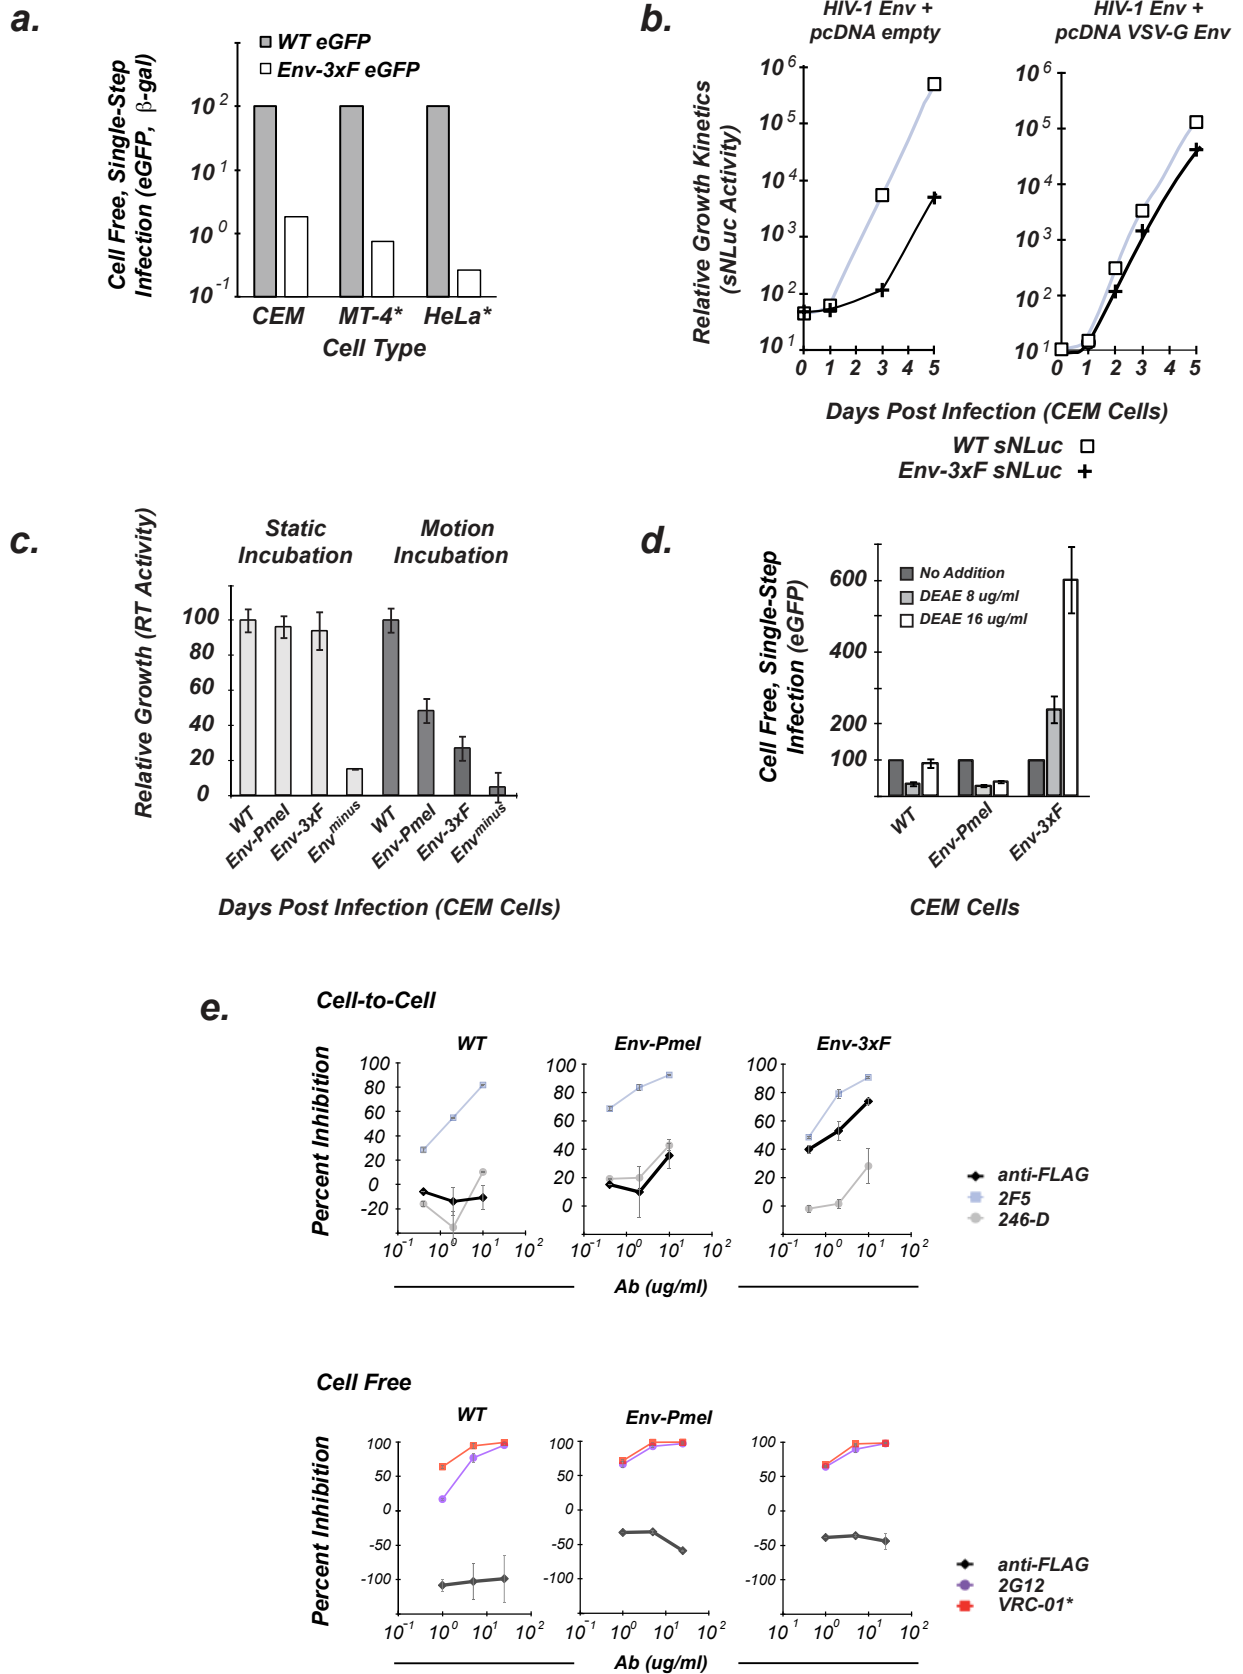

Supplementary Figure 10 (see legend on next page)

**Supplementary Figure 10 (previous page). Insertion of 3xFLAG tag alters the mode of viral transmission.** *a.* Env-3xF is remarkably defective for cell free infection compared to the WT virus. Under conditions of cell free infection, the growth of Env-3xF is highly compromised and exhibits about a 100-fold decrease in infection efficiency compared to the WT virus during single step infection of various types of susceptible cells. Viral eGFP derivatives of WT or Env-3xF (Supplementary Figure 9) were normalized for p24 content and used to infect three different cell types at a low moi and the extent of successful infection ascertained by scoring for GFP transduction by flow cytometry using lymphoid cell lines CEM and MT-4-GFP (MT-4\*) or measurement of  $\beta$ -galactosidase activity after infection of the HeLa-derived, HIV reporter cell line, TZM-bl (HeLa\*). Under these conditions, approximately 20% of both the CEM and MT-4 cells within the population were infected with the WT virus. The results presented are relative to the WT infection, which is arbitrarily set at a value of 100 ( $n=2$ ). *b.* Env-3xF is poorly transmitted by cell free infection but is nearly as efficient as WT viral growth kinetics when infection is normalized for the efficiency of the first round of infection. Consistent with the finding in *a.*, compared to the WT virus, Env-3xF is also delayed in achieving exponential growth during cycling infection that at later time points also results in a loss of up to two orders of magnitude of viral growth after 5 dpi (*b*, left plot). Paradoxically, although the Env-3xF virus is profoundly inefficient in establishing infection by the cell free route, it is able to proficiently expand in culture over a two week period in CEM cells suggesting the possibility that a major route of sustained infection for the Env-3xF virus in this cell type is via cell-to-cell contact and transmission through CEM suspension culture. Thus, we developed a system to bypass the initial infectious step using *super-pseudotyped* viruses containing the VSV-G envelope, setting to equivalence the number of cells infected for each type of reporter virus (Supplementary Figure 9B). Viral stocks were prepared as super-pseudotyped versions: WT and modified Env eGFP proviral DNAs were each co-transfected with a pcDNA VSV-G Env expression vector or as a control, pcDNA empty. Stocks were then normalized for RT activity and p24 CA content and used to infect CEM cells (*b*, right panel) and tracked across 5 dpi using sNLuc activity as a surrogate marker for viral expansion ( $n=2$ ). *c.* The growth of modified viruses in CEM cells are inhibited under incubation conditions of constant motion. WT is set to 100 for each respective growth condition. *d.* DEAE-dextran facilitates Env-3xF cell free infection of CEM cells. Values are relative to the no addition control infection set at 100 for each virus. The set of eGFP-marked viruses were used for this analysis. *e.* Env-3xF cell-to-cell, but not cell free transmission can be neutralized by the anti-FLAG mouse mAb, M2. A set of eGFP-marked viruses were super-pseudotyped with the VSV-G envelope protein and used to infect CEM cells such that approximately 1% of the cells were infected. 18 hpi, an aliquot of uninfected CEM cells were added in the presence of increasing concentrations of the indicated human or mouse monoclonal antibody, the percent of GFP positive cells relative to the no antibody control assessed after an additional 3 days of further incubation. Antibody inhibition of cell free transmission was measured in during single-step infection of HeLa\* indicator cells (see panel a) against the indicated antibody. In this experiment, viral infectivity was normalized to 5% for all viral stocks and the inoculum then incubated with antibody before infection of the indicator cell line. To facilitate figure display, the titration curve for VRC01\* is an order of magnitude lower in concentration than that of all other comparator antibodies.

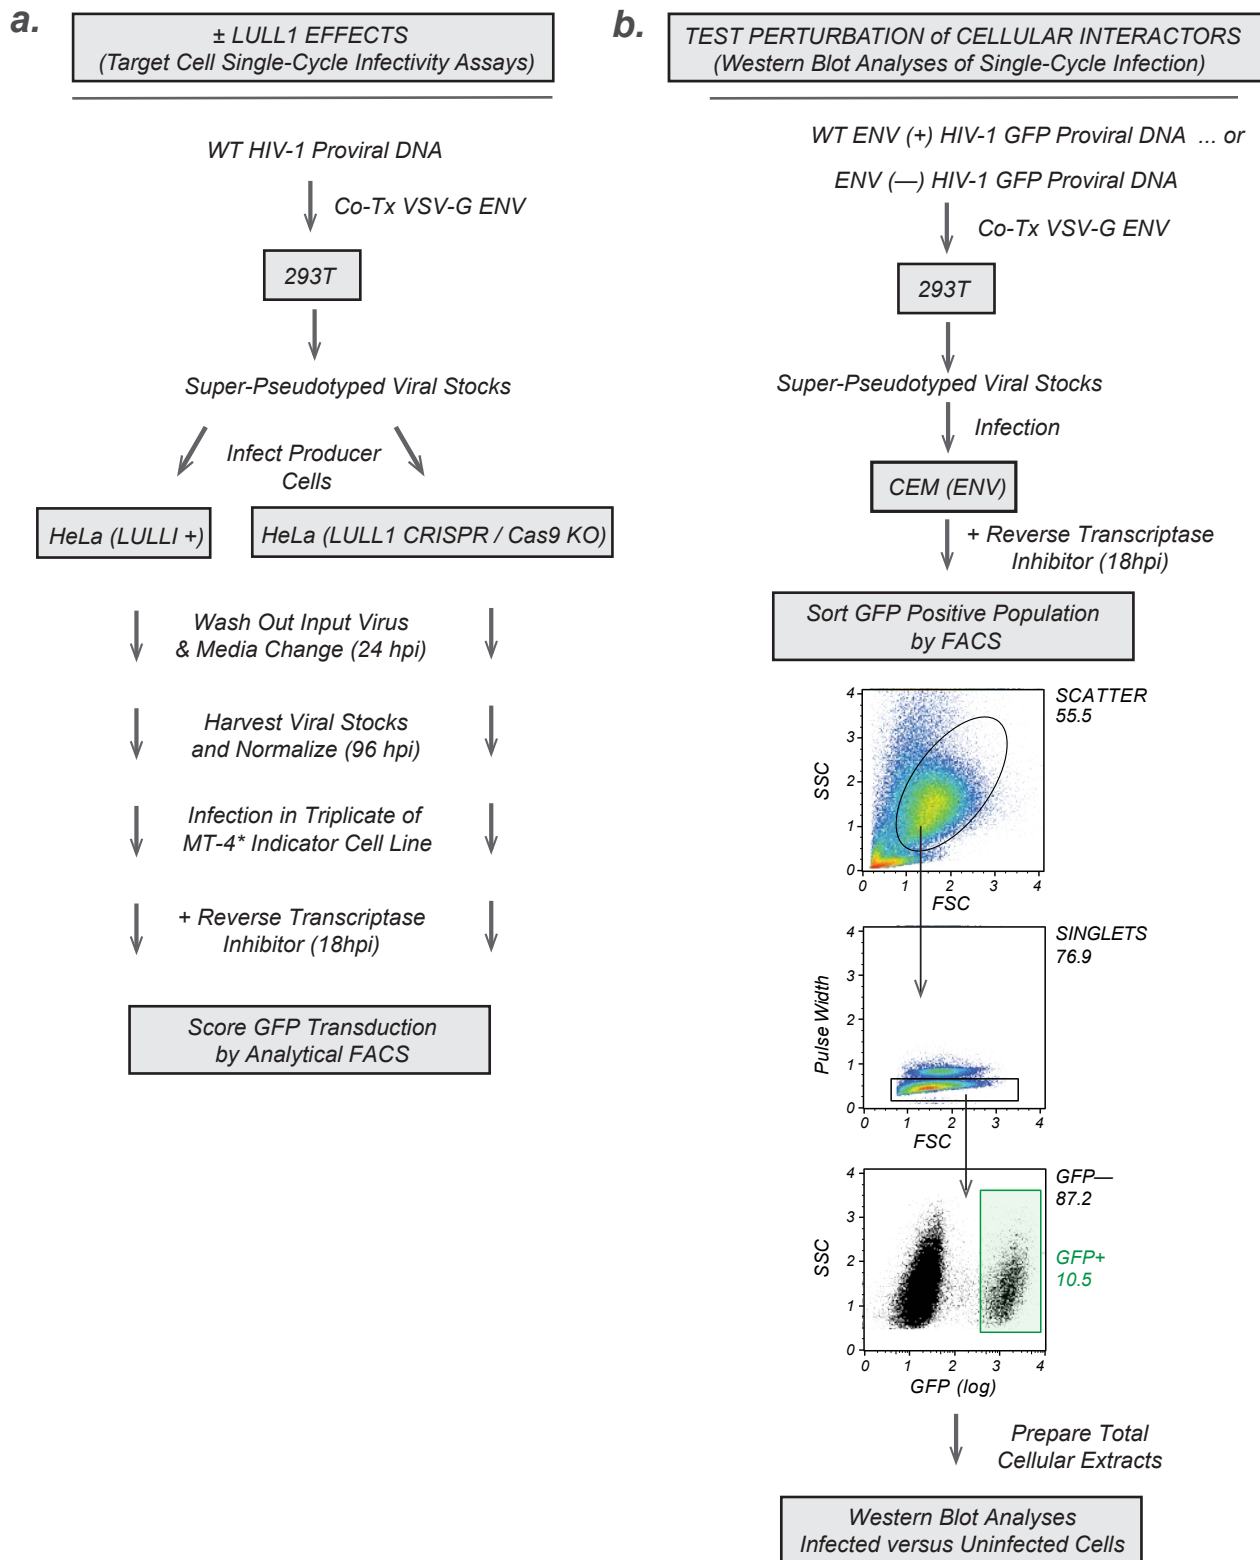

**Supplementary Figure 11. Schematic flow charts to determine:** *a.* Contribution of TOR1AIP2 (LULL1) to viral infectivity. *b.* Preparation of differentially infected cells (CEM) to examine the potential for Env-mediated perturbation of NOTCH1, a host interactor identified by I-DIRT analyses. The experimental specifics of these protocols can be found in the Methods.

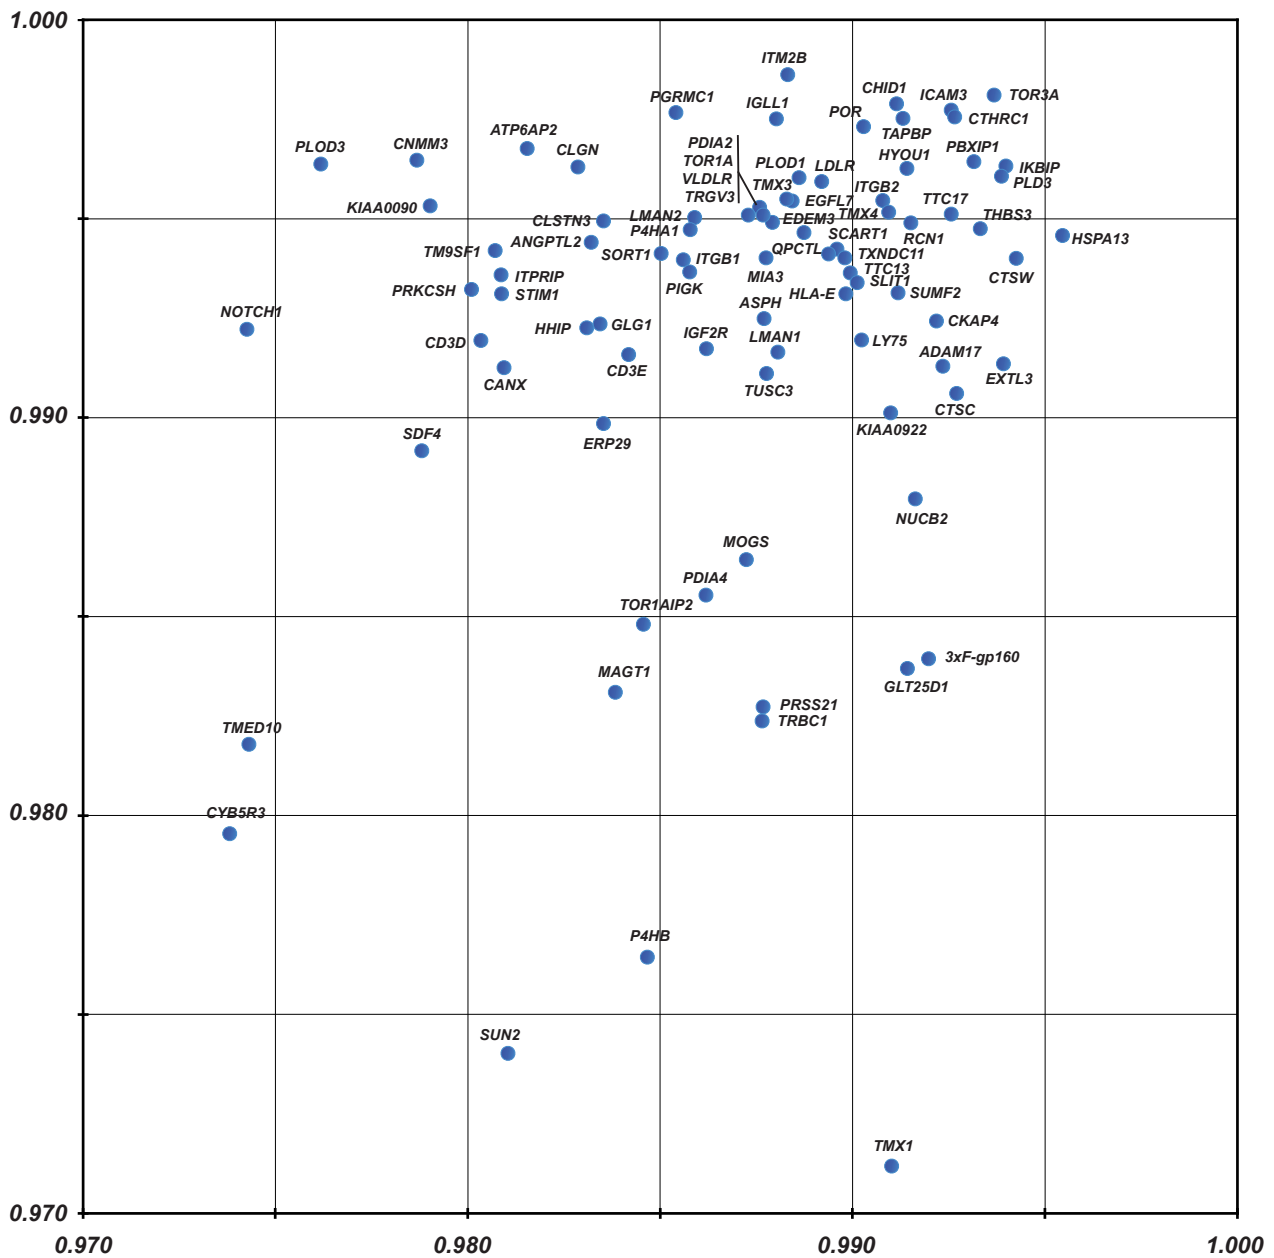

**Supplementary Figure 12. Detail of the I-DIRT ratios for the forward and reverse I-DIRT affinity isolations for the 3xFLAG-tagged HIV-1 Env protein.** The identity and relative placement of all specific (>0.97) Env interactors. Y axis: Reverse I-DIRT ratio; X-axis: Forward I-DIRT ratio.

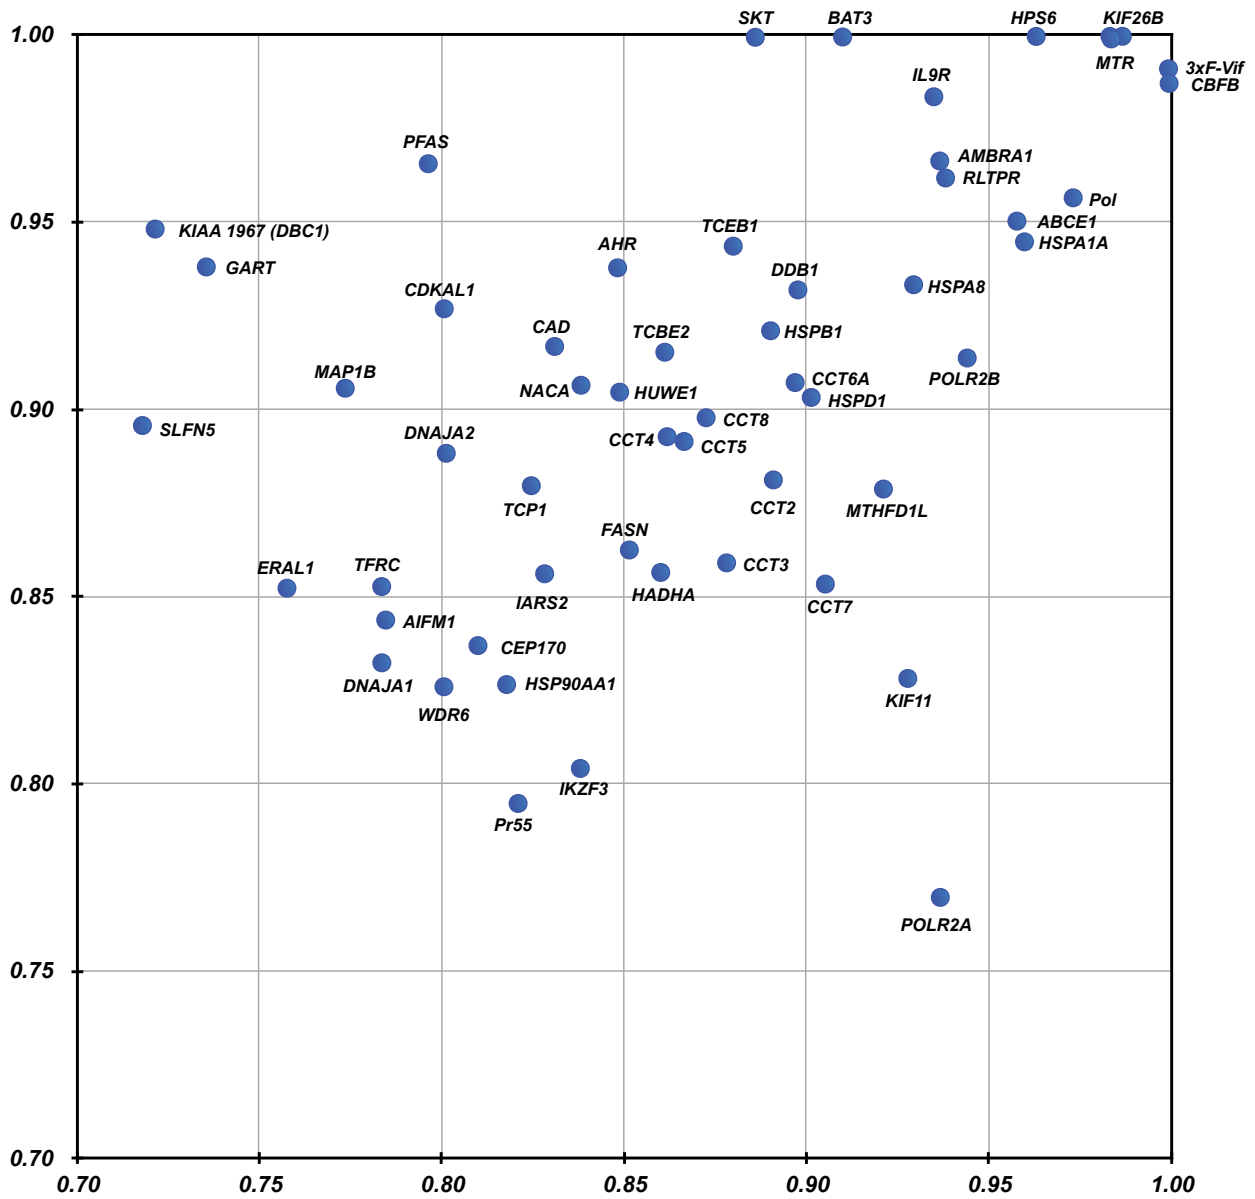

Supplementary Figure 13. Detail of the I-DIRT ratios for the forward and reverse I-DIRT affinity isolations for the 3xFLAG-tagged HIV-1 Vif protein. The identity and relative placement of all specific (>0.70) Vif interactors. Y axis: Reverse I-DIRT ratio; X-axis: Forward I-DIRT ratio.



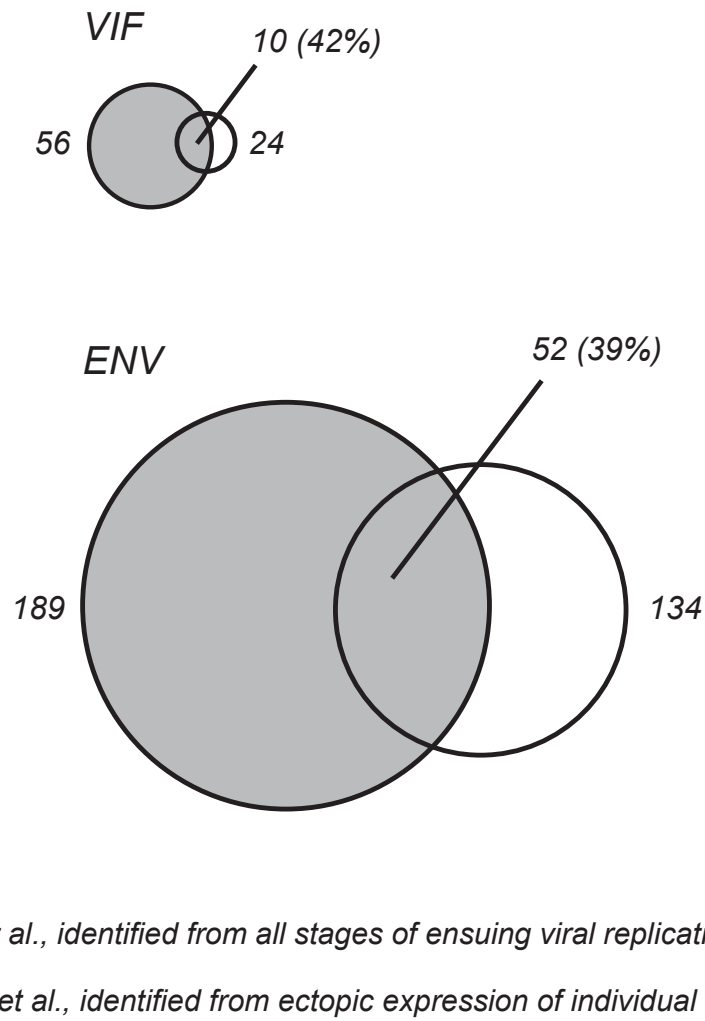

**Supplementary Figure 14. Venn diagram comparison of Vif and Env host protein interactions identified by these analyses and that of Jäger et al.** Number of interactors identified (see also Supplementary Figures 14, 15 and Supplementary Tables 1 and 2) for each viral protein and those overlapping between the two data sets. The percent of factors found by both groups is given with reference to the Jäger et al. study (i.e., shared identities divided by those in total by Jäger et al.).

Interactomes (Luo)

| VIF                                   |      |
|---------------------------------------|------|
| <b>Proteolysis</b>                    |      |
| CDFB                                  | 0.99 |
| NRD1                                  | 0.99 |
| DDB1                                  | 0.92 |
| TCEB1                                 | 0.91 |
| TCEB2                                 | 0.89 |
| HUWE1                                 | 0.88 |
| MAP1B                                 | 0.84 |
| CUL2                                  | 0.79 |
| APOBEC3G*                             | 0.57 |
| CUL5*                                 | 0.49 |
| <b>Purine Pyrimidine Biosynthesis</b> |      |
| MTR                                   | 0.99 |
| PFAS                                  | 0.88 |
| CAO                                   | 0.87 |
| GART                                  | 0.84 |
| MTHFD1L                               | 0.63 |
| <b>HIV-1 Gag (MA CA NC p6)</b>        |      |
| Poi (TF PR RT IN)                     | 0.97 |
| Gag (MA CA NC p6)                     | 0.81 |
| <b>Antiviral</b>                      |      |
| ABCE1                                 | 0.95 |
| <b>Chaperone</b>                      |      |
| BAT3                                  | 0.96 |
| HSPA1A                                | 0.95 |
| HSPA8                                 | 0.93 |
| HSPB1                                 | 0.91 |
| NACA                                  | 0.87 |
| DNAJA2                                | 0.85 |
| HSP90AA1                              | 0.82 |
| DNAJA1                                | 0.81 |
| <b>Autophagy / Lysosome</b>           |      |
| HPS6                                  | 0.98 |
| AMBRA1                                | 0.95 |
| WDR6                                  | 0.81 |
| <b>Cytoskeleton</b>                   |      |
| KIF26B                                | 0.99 |
| RLTPR                                 | 0.95 |
| HSPB1                                 | 0.91 |
| KIF11                                 | 0.88 |
| MAP1B                                 | 0.84 |
| CEP170                                | 0.82 |
| <b>TRIC</b>                           |      |
| CCT6A                                 | 0.90 |
| CCT2                                  | 0.89 |
| CCT8                                  | 0.89 |
| CCT5                                  | 0.88 |
| CCT7                                  | 0.88 |
| CCT4                                  | 0.88 |
| CCT3                                  | 0.87 |
| TCF1                                  | 0.85 |
| <b>Misc / Unknown</b>                 |      |
| IL9R                                  | 0.96 |
| SKT                                   | 0.94 |
| HSPD1                                 | 0.90 |
| CDKAL1                                | 0.86 |
| HADHA                                 | 0.86 |
| FASN                                  | 0.86 |
| IARS2                                 | 0.84 |
| TFRC                                  | 0.82 |
| AIFM1                                 | 0.81 |
| SLFN5                                 | 0.81 |
| ERAL1                                 | 0.81 |
| <b>Nuclear</b>                        |      |
| GBFB                                  | 0.99 |
| BAT3                                  | 0.96 |
| HSPA8                                 | 0.93 |
| POLR2B                                | 0.93 |
| TCEB1                                 | 0.91 |
| AHR                                   | 0.89 |
| TCEB2                                 | 0.89 |
| NACA                                  | 0.87 |
| POLR2A                                | 0.85 |
| DBC1                                  | 0.84 |
| IKZF3                                 | 0.82 |

Class Not Found (Luo)

Proteasome

| ENV                                       |      |
|-------------------------------------------|------|
| <b>ER</b>                                 |      |
| TOR3A (ADIR)                              | 1.00 |
| FLJ3                                      | 1.00 |
| HSPA13                                    | 1.00 |
| POR                                       | 0.99 |
| CTSW                                      | 0.99 |
| EXTL3                                     | 0.99 |
| RCN1                                      | 0.99 |
| SUMF2                                     | 0.99 |
| FLOD1                                     | 0.99 |
| CTSC                                      | 0.99 |
| CKAP4                                     | 0.99 |
| MIA3                                      | 0.99 |
| TOR1A                                     | 0.99 |
| PIGK                                      | 0.99 |
| ASPH                                      | 0.99 |
| RHAI1                                     | 0.99 |
| LMAN1                                     | 0.99 |
| LMAN2                                     | 0.99 |
| CLGN                                      | 0.99 |
| TUSC3                                     | 0.99 |
| GLT25D1                                   | 0.99 |
| KIAA090                                   | 0.99 |
| ERP28                                     | 0.99 |
| PRKCSH                                    | 0.99 |
| MOGS                                      | 0.99 |
| FLOD3                                     | 0.99 |
| TOR1AIP2                                  | 0.99 |
| SDF4                                      | 0.98 |
| MAGT1                                     | 0.98 |
| F4H8                                      | 0.98 |
| EXT2                                      | 0.98 |
| SUN2                                      | 0.98 |
| TMEM43                                    | 0.98 |
| SUN1                                      | 0.98 |
| RPN1                                      | 0.97 |
| CALR                                      | 0.97 |
| STPB3                                     | 0.97 |
| ERP44                                     | 0.97 |
| GANAB                                     | 0.97 |
| DNAJC3                                    | 0.97 |
| TOR1AIP1                                  | 0.96 |
| DDOST                                     | 0.95 |
| RCN2                                      | 0.94 |
| GPA1A                                     | 0.94 |
| PIGT                                      | 0.94 |
| UGT1                                      | 0.94 |
| CALU                                      | 0.93 |
| LMP2                                      | 0.93 |
| SACM1L                                    | 0.93 |
| RPN2                                      | 0.91 |
| SSR1                                      | 0.91 |
| ACSL3                                     | 0.90 |
| FDFT1                                     | 0.90 |
| ESYT1                                     | 0.90 |
| SRPRB                                     | 0.87 |
| RDH11                                     | 0.87 |
| ATL3                                      | 0.87 |
| SSR4                                      | 0.85 |
| HM13                                      | 0.82 |
| LPCAT3                                    | 0.80 |
| ATP2A3                                    | 0.79 |
| TMEM109                                   | 0.79 |
| DHCR7                                     | 0.77 |
| HSD17B12                                  | 0.76 |
| ATP2A2                                    | 0.75 |
| ERLEC1                                    | 0.72 |
| CD4*                                      | 0.54 |
| <b>Chaperone / ERAD</b>                   |      |
| HYDU1                                     | 0.99 |
| FLJ3                                      | 1.00 |
| ERP29                                     | 0.99 |
| CANX                                      | 0.99 |
| SIL1                                      | 0.98 |
| HSPA5 (BiP)                               | 0.97 |
| HSP90B1                                   | 0.97 |
| OS9                                       | 0.96 |
| DNAJB11                                   | 0.95 |
| DNAJC10                                   | 0.95 |
| SEL1L                                     | 0.92 |
| <b>Thio / Redox</b>                       |      |
| TMX4                                      | 0.99 |
| TMX3                                      | 0.99 |
| TXNDC11                                   | 0.99 |
| PDIA2                                     | 0.99 |
| PDIA4                                     | 0.99 |
| TMX1                                      | 0.98 |
| GPX7                                      | 0.97 |
| EROL1                                     | 0.97 |
| PDIA3                                     | 0.97 |
| TXNDC5                                    | 0.93 |
| PDIA6                                     | 0.85 |
| <b>Autophagy</b>                          |      |
| TM5SF1                                    | 0.99 |
| <b>NFkB Circuitry</b>                     |      |
| IKBIP (IKIP)                              | 1.00 |
| <b>ER to Golgi Transport</b>              |      |
| SORT1                                     | 0.99 |
| TMED10                                    | 0.98 |
| SAR1A                                     | 0.94 |
| ERGIC2                                    | 0.94 |
| PRXAF2                                    | 0.87 |
| VCP                                       | 0.87 |
| SEC22B                                    | 0.84 |
| ERGIC3                                    | 0.82 |
| ERGIC1                                    | 0.74 |
| <b>Golgi</b>                              |      |
| GRCTL                                     | 0.99 |
| GLT1                                      | 0.99 |
| FUT8                                      | 0.98 |
| CHPF2                                     | 0.97 |
| CPD                                       | 0.94 |
| COPB2                                     | 0.76 |
| <b>Antigenic / Immunity</b>               |      |
| CHID1                                     | 1.00 |
| TAPBP                                     | 0.99 |
| HLA-E                                     | 0.99 |
| HM13                                      | 0.82 |
| ERAP1                                     | 0.97 |
| DNAJC3                                    | 0.97 |
| TAPBP                                     | 0.91 |
| BATS                                      | 0.89 |
| TAP2                                      | 0.79 |
| ERAP2                                     | 0.74 |
| <b>Rab Machinery</b>                      |      |
| RAB7A                                     | 0.93 |
| RAB10                                     | 0.87 |
| RAB5C                                     | 0.84 |
| RAB14                                     | 0.83 |
| RAB11A                                    | 0.75 |
| <b>Proteasome</b>                         |      |
| PSMD11                                    | 0.86 |
| PSMD13                                    | 0.85 |
| PSMD1                                     | 0.79 |
| PSMC3                                     | 0.76 |
| <b>Misc / Unknown</b>                     |      |
| TTC17                                     | 0.99 |
| TTC13                                     | 0.99 |
| KIA0922                                   | 0.99 |
| CYBSR3                                    | 0.98 |
| TMEM194A                                  | 0.95 |
| NUP210                                    | 0.95 |
| SDF2L1                                    | 0.94 |
| IMPDH2                                    | 0.91 |
| C16orf8                                   | 0.89 |
| TUFM                                      | 0.85 |
| NUP133                                    | 0.81 |
| RNH1                                      | 0.80 |
| EMD                                       | 0.79 |
| PGK1                                      | 0.78 |
| OSBPL8                                    | 0.78 |
| LMNB1                                     | 0.75 |
| RUVBL1                                    | 0.74 |
| UBB                                       | 0.73 |
| CCT8                                      | 0.72 |
| RUVBL2                                    | 0.72 |
| <b>Cell Membrane Extracellular Matrix</b> |      |
| ICAM3 (CD50)                              | 1.00 |
| CTHRC1                                    | 1.00 |
| PBXIP1                                    | 1.00 |
| CHID1                                     | 1.00 |
| THBS3                                     | 0.99 |
| ITM2B                                     | 0.99 |
| IGLL1                                     | 0.99 |
| ITGB2 (CD18)                              | 0.99 |
| LDLR                                      | 0.99 |
| SLIT1                                     | 0.99 |
| EGFL7                                     | 0.99 |
| PGRMC1                                    | 0.99 |
| SCART1                                    | 0.99 |
| ADAM17                                    | 0.99 |
| DEC205 (LY75)                             | 0.99 |
| TRGV3 (TCRg)                              | 0.99 |
| VLDLR                                     | 0.99 |
| ITGB1 (CD29)                              | 0.99 |
| NUCB2                                     | 0.99 |
| ANGPTL2                                   | 0.99 |
| CLSTN3                                    | 0.99 |
| ATP6AP2                                   | 0.99 |
| IGF2R                                     | 0.99 |
| CNMM3                                     | 0.99 |
| HHIP                                      | 0.99 |
| CD3E                                      | 0.99 |
| ITPRIP (DANGER)                           | 0.99 |
| STIM1                                     | 0.99 |
| CD3D                                      | 0.99 |
| PRSS21                                    | 0.99 |
| TRBC1 (TCRb)                              | 0.99 |
| NOTCH1                                    | 0.98 |
| ITGA6 (CD49)                              | 0.98 |
| APMAP                                     | 0.97 |
| ATP1B3                                    | 0.96 |
| ADAM10                                    | 0.95 |
| LEPRE1                                    | 0.94 |
| IL2RG (CD132)                             | 0.93 |
| DHCR24                                    | 0.91 |
| CRTAP                                     | 0.87 |
| TFRC                                      | 0.86 |
| ITM2A                                     | 0.86 |
| CLPTM1L                                   | 0.84 |
| CLC1                                      | 0.81 |
| PTPRC (CD45)                              | 0.73 |
| RAC2                                      | 0.72 |

Class Not Found (Luo)

Mitochondria

Nuclear

Cytoplasm

**Supplementary Figure 15. Comparison of the Vif and Env cellular interactors identified from cycling infection (Luo et al.) or from ectopic expression of individual viral proteins (Jäger et al.).** All proteins identified by I-DIRT analysis are listed (along with their averaged forward and reverse I-DIRT quotient). Yellow highlight, host proteins only identified by I-DIRT analyses of immunoprecipitations from ensuing infected cell culture. Unhighlighted, host proteins identified by both approaches. Asterisk (APOBEC3G, CUL5, CD4), proteins found to be in dynamic association with the viral machinery. Disparate functional and/or subcellular localization classes are listed to the right.

## Interactomes (Jäger)

| VIF                                                                                                                                                                                                                                                                                                                                                                                                                    |                                                                                                                                                                                                                                                                                                                                                                                                                                                                      |                                                                                                                                                                                                                                                                                                                                                                                                                                            | Class Not Found (Jäger)                                                                                                                                                                                                                                                                                                                                                                       |                                           |
|------------------------------------------------------------------------------------------------------------------------------------------------------------------------------------------------------------------------------------------------------------------------------------------------------------------------------------------------------------------------------------------------------------------------|----------------------------------------------------------------------------------------------------------------------------------------------------------------------------------------------------------------------------------------------------------------------------------------------------------------------------------------------------------------------------------------------------------------------------------------------------------------------|--------------------------------------------------------------------------------------------------------------------------------------------------------------------------------------------------------------------------------------------------------------------------------------------------------------------------------------------------------------------------------------------------------------------------------------------|-----------------------------------------------------------------------------------------------------------------------------------------------------------------------------------------------------------------------------------------------------------------------------------------------------------------------------------------------------------------------------------------------|-------------------------------------------|
| <b>Proteolysis</b><br>CFBF<br>TCEB1<br>TCEB2<br>CUL2<br>CUL5<br>HUWE1<br>RNF7<br>STUB1<br>UBR2<br>MAGED1<br>DCAF11                                                                                                                                                                                                                                                                                                     | <b>Chaperone</b><br>BAT3 (BAG6)<br>UBL4A<br>DNJB2<br>DNAJC7<br><br><b>Autophagy / Lysosome</b><br>AMBRA1<br>SQSTM1                                                                                                                                                                                                                                                                                                                                                   | <b>Proteasome</b><br>PSME3<br><br><b>Nuclear</b><br>CFBF<br>BAT3 (BAG6)<br>HDAC3<br>NCOR1<br>TBL1XR1<br>GPS2<br>AKAP8L<br>MAPK6                                                                                                                                                                                                                                                                                                            | <b>Purine Pyrimidine Biosynthesis</b><br>HIV-1<br>Antiviral<br>Cytoskeleton<br>TRiC                                                                                                                                                                                                                                                                                                           |                                           |
| ENV                                                                                                                                                                                                                                                                                                                                                                                                                    |                                                                                                                                                                                                                                                                                                                                                                                                                                                                      |                                                                                                                                                                                                                                                                                                                                                                                                                                            | Class Not Found (Jäger)                                                                                                                                                                                                                                                                                                                                                                       |                                           |
| <b>ER</b><br>HSPA13<br>SUMF2<br>CKAP4<br>TOR1A<br>LMAN1<br>LMAN2<br>CLGN<br>COLGALT1<br>KIAA0090<br>PRKCSH<br>MOGS<br>TOR1AIP2<br>SDF4<br>MAGT1<br>P4HB<br>TMEM43<br>SUN1<br>RPN1<br>CALR<br>ERP44<br>GANAB<br>DNAJC3<br>RCN2<br>UGGT1<br>CALU<br>ATL3<br>SSR4<br>HM13<br>ATP2A3<br>ERLEC1<br>CD4<br>SDF2<br>SEC61A1<br>TMEM38B<br>ATP2A2<br>CLN6<br>RNF5<br>SEC62<br>VAPA<br>HACD3<br>MMT1<br>SPCS2<br>SPCS3<br>P4HA2 | <b>Chaperone / ERAD</b><br>HYOU1<br>EDEM3<br>CANX<br>HSP90B1<br>OS9<br>DNAJB11<br>SEL1L<br>MESDC2<br>FBXO6<br>BCAP31<br>HSPA6<br><br><b>Thio / Redox</b><br>PDIA4<br>PDIA3<br>TXNDC5<br>PRDX4<br>PDIA5<br><br><b>ER to Golgi Transport</b><br>ERGIC2<br>VCP<br>ERGIC3<br>VT11A<br>SURF4<br>RER1<br><br><b>Golgi</b><br>GLG1<br>FUT8<br>DHCR24<br>AP1M1<br>ACBD3<br><br><b>Antigenic / Immunity</b><br>HM13<br>KIR3DL1<br>KIR3DL2<br>HLA (B-27, B-58, A-68 $\alpha$ ) | <b>Rab Machinery</b><br>RABGAP1<br><br><b>Proteasome</b><br>PSMD11<br>PMSA1<br>PSMB6<br>PSMD7<br><br><b>Misc / Unknown</b><br>SDF2L1<br>FLOT1<br>C20orf24<br>KIAA2013<br>FAM133B<br>FAM195A<br>HSPA7<br>LSM12<br><br><b>Mitochondria</b><br>COX411<br>VDAC1<br>VDAC2<br>VDAC3<br>PHB<br>COX6B1<br>COX5A<br>PHB2<br>TOMM40<br>NDUFB10<br>TIMM8A<br>TIMM8B<br>TIMM13<br>STOML2<br><br><b>Nuclear</b><br>CHAP1B<br>SEH1L<br>CASC3<br>HIST1H3A | <b>Cell Membrane Extracellular Matrix</b><br>ITM2B<br>ITGB2 (CD18)<br>LDLR<br>PGRMC1<br>TRGV3 (TCR $\gamma$ )<br>TRBC1 (TCR $\beta$ )<br>DHCR24<br>PON2<br>ITGAL (CD11a)<br>RHOC<br>CTSD<br>CHI3L2<br>DSC3<br>CAPN1<br>ENDOD1<br>PSL1<br>SERPINH1<br>EVL<br>ITGA4 (CD49d)<br>EFEMP1<br><br><b>Cytoplasm</b><br>HSPH1<br>NGLY1<br>SPAG5<br>PIP4K2A<br>DDX6<br>G3BP1<br>G3BP2<br>RNF126<br>TAB2 | <b>Autophagy</b><br><b>NFKB Circuitry</b> |

**Supplementary Figure 16. Comparison cellular interactors identified by individualized ectopic expression of Vif and Env proteins (Jäger et al.) or from cycling viral infection (Luo et al.).** All proteins identified by individualized ectopic expression of Vif and Env proteins are listed. Those shared also by I-DIRT identification from infected cell culture are shown in yellow highlight and listed along with their averaged forward and reverse I-DIRT quotient. Disparate cellular functional and/or subcellular localization classes are listed to the right.

**Figure 1b**

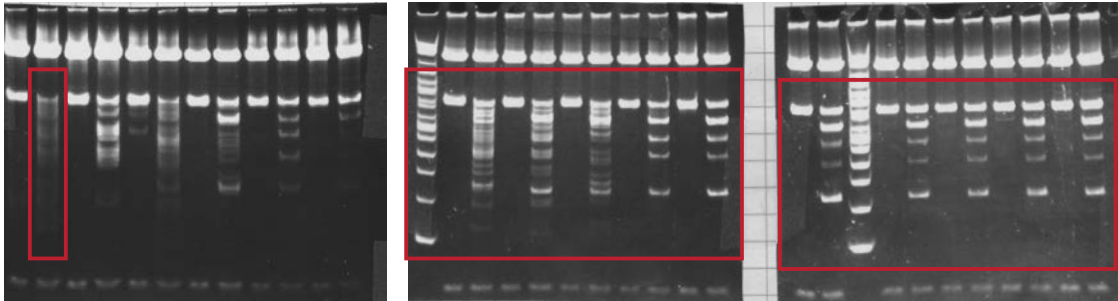

**Figure 5a**

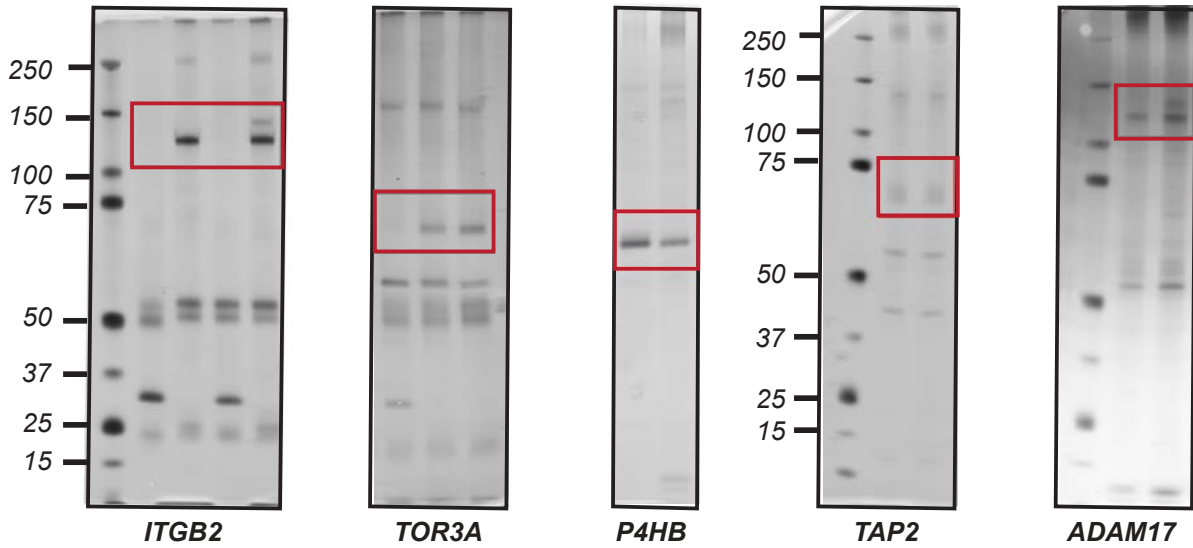

**Figure 5d**

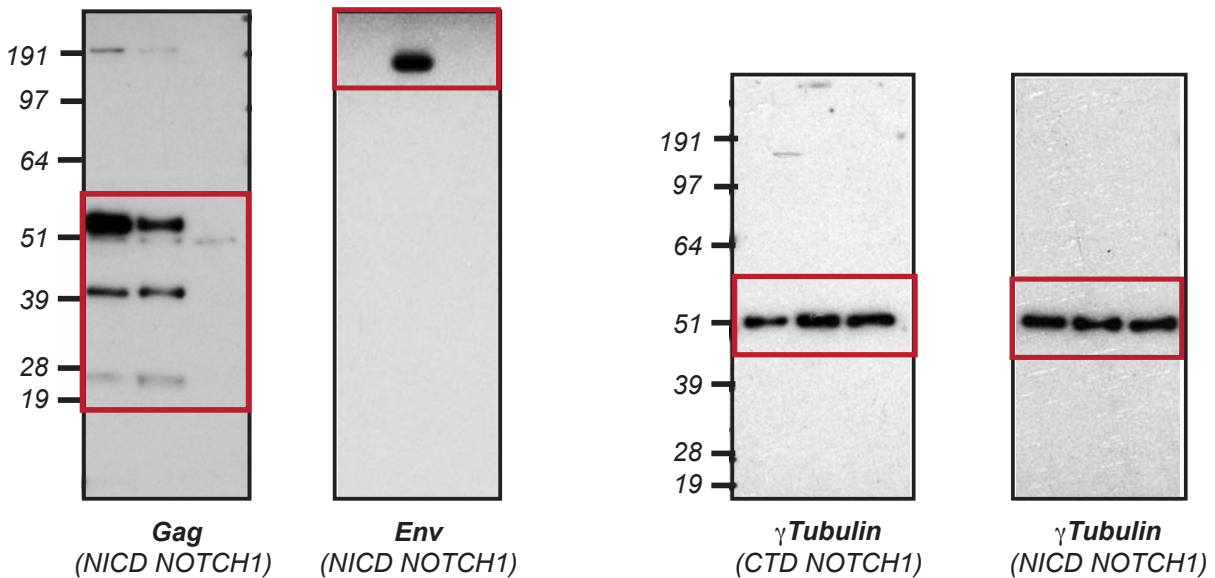

Supplementary Figure 17a. Raw data presentation

**Figure 5e**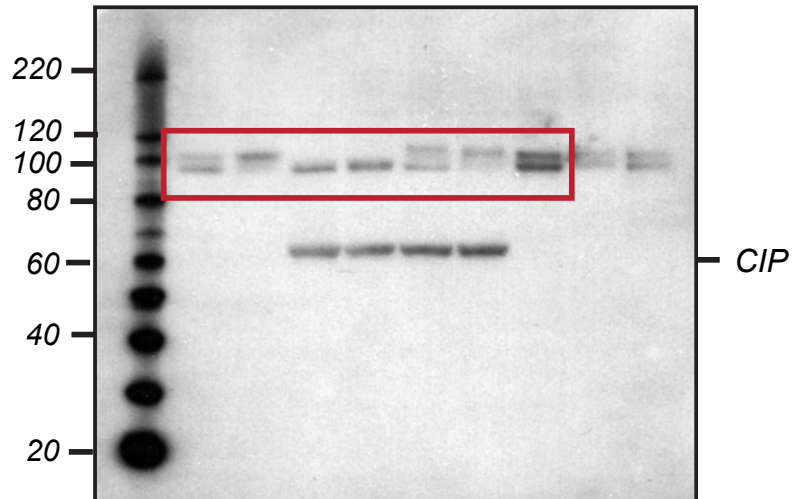**Figure 5f**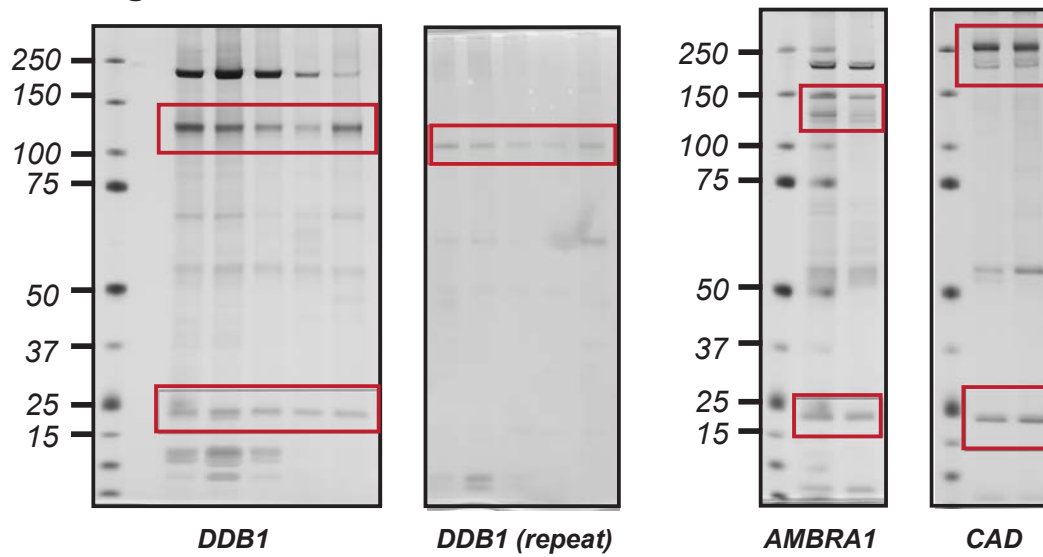

Supplementary Figure 17b. Raw data presentation

**Supplementary Figure 1a**

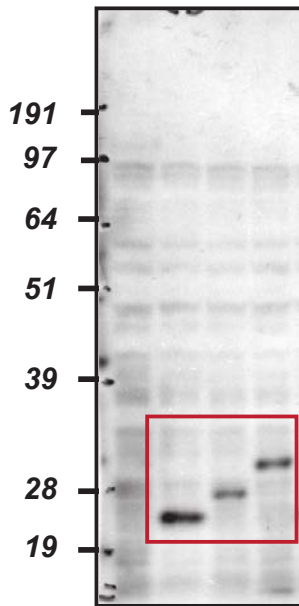

**Vif**

**Supplementary Figure 8a**

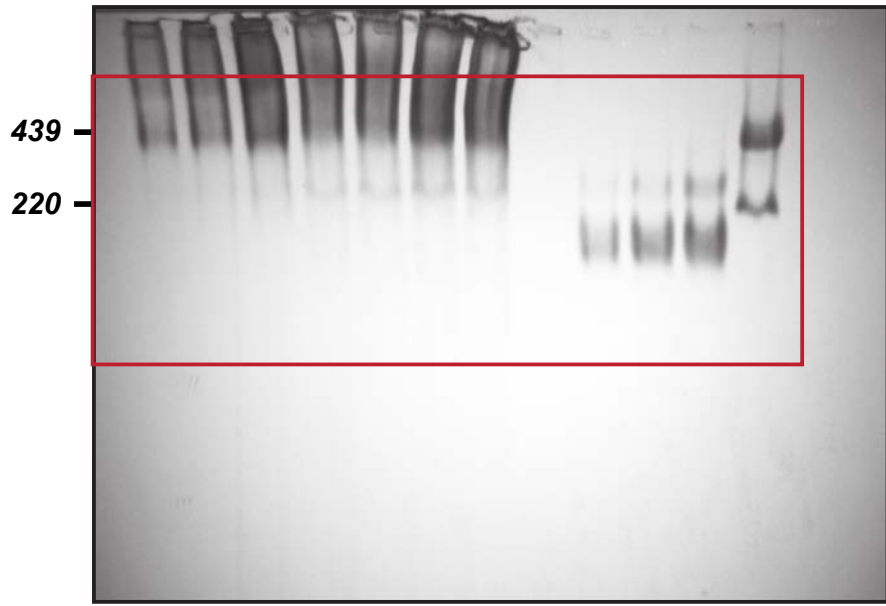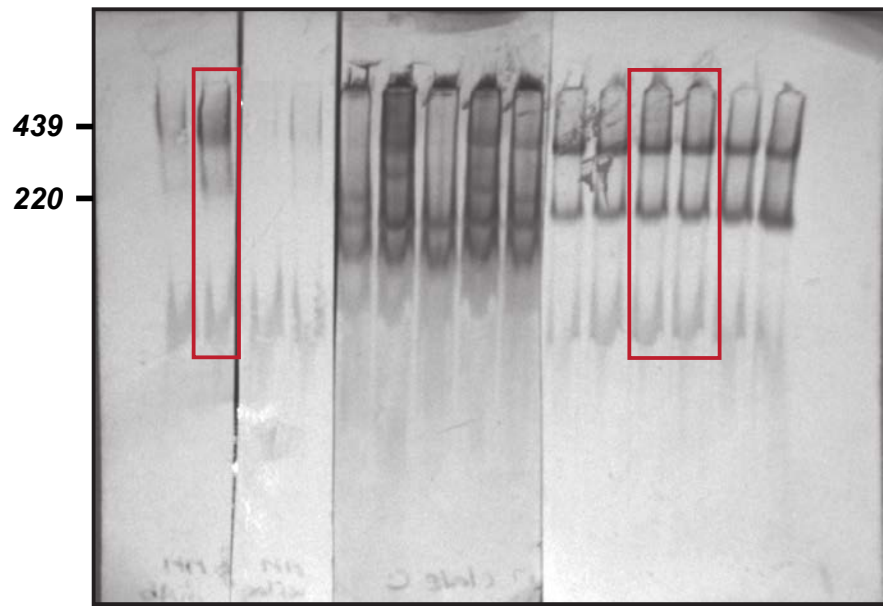

**Env**

Supplementary Figure 17c. Raw data presentation

| UNIPROT<br>ACCESSION | DESCRIPTION                                                    | GENE     | LENGTH<br>(AA) | IDIRT SPECIFICITY<br>FORWARD | IDIRT SPECIFICITY<br>REVERSE | IDIRT SPECIFICITY<br>AVERAGE | QUANT PSM<br>FORWARD | QUANT PSM<br>REVERSE | TOTAL PSM<br>FORWARD | TOTAL PSM<br>REVERSE | TOTAL PSM<br>SUM | JAGER<br>et al |
|----------------------|----------------------------------------------------------------|----------|----------------|------------------------------|------------------------------|------------------------------|----------------------|----------------------|----------------------|----------------------|------------------|----------------|
| Q9H497               | Torsin-3A                                                      | TOR3A    | 397            | 0.99                         | 1.00                         | 1.00                         | 12                   | 9                    | 14                   | 15                   | 29               |                |
| Q70J00               | Inhibitor of nuclear factor kappa-B kinase-interacting protein | IKBKI    | 350            | 0.99                         | 1.00                         | 1.00                         | 35                   | 20                   | 42                   | 28                   | 70               |                |
| P32942               | Intercellular adhesion molecule 3                              | ICAM3    | 547            | 0.99                         | 1.00                         | 1.00                         | 9                    | 3                    | 12                   | 5                    | 17               |                |
| Q96CG8               | Collagen triple helix repeat-containing protein 1              | CTHRC1   | 243            | 0.99                         | 1.00                         | 1.00                         | 3                    | 7                    | 4                    | 7                    | 11               |                |
| P48723               | Heat shock 70 kDa protein 13                                   | HSPA13   | 471            | 1.00                         | 0.99                         | 1.00                         | 9                    | 10                   | 10                   | 14                   | 24               | #              |
| Q8V08                | Phospholipase D3                                               | PLD3     | 490            | 0.99                         | 1.00                         | 0.99                         | 4                    | 3                    | 9                    | 3                    | 12               |                |
| Q96AQ6               | Pre-B-cell leukemia transcription factor-interacting protein 1 | PBXIP1   | 731            | 0.99                         | 1.00                         | 0.99                         | 59                   | 42                   | 82                   | 57                   | 139              |                |
| Q9BWS9               | Chitinase domain-containing protein 1                          | CHD1     | 393            | 0.99                         | 1.00                         | 0.99                         | 6                    | 7                    | 7                    | 10                   | 17               |                |
| O15533               | Tapsin                                                         | TAPSP    | 448            | 0.99                         | 1.00                         | 0.99                         | 6                    | 6                    | 8                    | 7                    | 15               |                |
| P56202               | Cathepsin W                                                    | CTSW     | 376            | 0.99                         | 0.99                         | 0.99                         | 4                    | 7                    | 8                    | 10                   | 18               |                |
| P49746               | Thrombospondin-3                                               | THBS3    | 956            | 0.99                         | 0.99                         | 0.99                         | 41                   | 24                   | 49                   | 27                   | 76               |                |
| Q96AE7               | Tetrapeptide repeat protein 17                                 | TTCT17   | 1141           | 0.99                         | 1.00                         | 0.99                         | 22                   | 11                   | 29                   | 13                   | 42               |                |
| Q9Y4L1               | Hypoxia up-regulated protein 1                                 | HYOU1    | 999            | 0.99                         | 1.00                         | 0.99                         | 179                  | 199                  | 236                  | 318                  | 554              | #              |
| P16435               | NADPH-cytochrome P450 reductase                                | POR      | 677            | 0.99                         | 1.00                         | 0.99                         | 11                   | 3                    | 13                   | 3                    | 16               |                |
| Q9Y287               | Integrin alpha-5                                               | ITGA5    | 266            | 0.99                         | 1.00                         | 0.99                         | 3                    | 3                    | 3                    | 4                    | 7                | #              |
| Q15293               | Reticulocalbin-1                                               | RCN1     | 331            | 0.99                         | 0.99                         | 0.99                         | 8                    | 14                   | 10                   | 18                   | 28               |                |
| P05107               | Integrin beta-2                                                | ITGB2    | 769            | 0.99                         | 1.00                         | 0.99                         | 165                  | 101                  | 221                  | 140                  | 361              |                |
| Q9H1E5               | Thioredoxin-related transmembrane protein 4                    | TXM4     | 349            | 0.99                         | 1.00                         | 0.99                         | 7                    | 10                   | 10                   | 14                   | 24               |                |
| P15814               | Immunoglobulin lambda-like polypeptide 1                       | IGLL1    | 213            | 0.99                         | 1.00                         | 0.99                         | 5                    | 7                    | 10                   | 8                    | 18               |                |
| Q43909               | Exostosin-like 3                                               | EXTL3    | 918            | 0.99                         | 0.99                         | 0.99                         | 6                    | 4                    | 9                    | 4                    | 13               |                |
| P01130               | Low-density lipoprotein receptor                               | LDLR     | 860            | 0.99                         | 1.00                         | 0.99                         | 37                   | 30                   | 50                   | 42                   | 92               | #              |
| Q02809               | Procollagen-lysine,2-oxoglutarate 5-dioxygenase 1              | PLOD1    | 727            | 0.99                         | 1.00                         | 0.99                         | 3                    | 4                    | 7                    | 4                    | 11               |                |
| Q07065               | Cytoskeleton-associated protein 4                              | CKAP4    | 602            | 0.99                         | 0.99                         | 0.99                         | 23                   | 15                   | 47                   | 20                   | 67               | #              |
| Q8NBJ7               | Sulfatase-modifying factor 2                                   | SUMF2    | 301            | 0.99                         | 0.99                         | 0.99                         | 10                   | 21                   | 18                   | 50                   | 68               | #              |
| Q9UHF1               | Epidermal growth factor-like protein 7                         | EGFL7    | 273            | 0.99                         | 1.00                         | 0.99                         | 4                    | 6                    | 4                    | 6                    | 10               |                |
| Q4G0T1               | Putative scavenger receptor cysteine-rich protein LOC619207    | SCART1   | 1027           | 0.99                         | 0.99                         | 0.99                         | 36                   | 14                   | 52                   | 19                   | 71               |                |
| Q8PKC3               | Thioredoxin domain-containing protein 11                       | TXNDC11  | 985            | 0.99                         | 0.99                         | 0.99                         | 7                    | 4                    | 9                    | 5                    | 14               |                |
| Q26LJ7               | Protein disulfide-isomerase TXM3                               | TXM3     | 454            | 0.99                         | 1.00                         | 0.99                         | 14                   | 12                   | 17                   | 12                   | 29               |                |
| P78536               | Disintegrin and metalloproteinase domain-containing protein 17 | ADAM17   | 524            | 0.99                         | 0.99                         | 0.99                         | 3                    | 3                    | 3                    | 5                    | 8                |                |
| Q8NBP0               | Tetrapeptide repeat protein 13                                 | TTCT13   | 860            | 0.99                         | 0.99                         | 0.99                         | 8                    | 5                    | 15                   | 7                    | 22               |                |
| O75093               | Slit homolog 1 protein                                         | SLIT1    | 1534           | 0.99                         | 0.99                         | 0.99                         | 12                   | 5                    | 21                   | 12                   | 33               |                |
| Q9NXS2               | Glutaminyl-peptide cyclotransferase-like protein               | QPCTL    | 382            | 0.99                         | 0.99                         | 0.99                         | 5                    | 4                    | 5                    | 6                    | 11               |                |
| Q9BZQ6               | ER degradation-enhancing alpha-mannosidase-like 3              | EDEM3    | 932            | 0.99                         | 0.99                         | 0.99                         | 17                   | 9                    | 27                   | 16                   | 43               | #              |
| P53634               | Dipeptidyl peptidase 1                                         | CDSC     | 463            | 0.99                         | 0.99                         | 0.99                         | 3                    | 3                    | 3                    | 3                    | 6                |                |
| Q00264               | Membrane-associated progesterone receptor component 1          | PMRMC1   | 196            | 0.99                         | 1.00                         | 0.99                         | 4                    | 7                    | 8                    | 7                    | 15               | #              |
| P13747               | HLA-A*1 histocompatibility antigen, alpha chain E              | HLA-E    | 409            | 0.99                         | 0.99                         | 0.99                         | 12                   | 6                    | 23                   | 65                   | 88               |                |
| Q13087               | Protein disulfide-isomerase A2                                 | PDI2A    | 525            | 0.99                         | 1.00                         | 0.99                         | 6                    | 9                    | 12                   | 13                   | 25               |                |
| P98155               | Very low-density lipoprotein receptor                          | VLDLR    | 873            | 0.99                         | 0.99                         | 0.99                         | 9                    | 11                   | 9                    | 13                   | 22               |                |
| P03979               | T-cell receptor gamma chain V region PT-gamma-1/2              | TRGV3    | 136            | 0.99                         | 1.00                         | 0.99                         | 5                    | 3                    | 8                    | 4                    | 12               | #              |
| O14656               | Torsin-1A                                                      | TOR1A    | 332            | 0.99                         | 1.00                         | 0.99                         | 6                    | 8                    | 9                    | 15                   | 24               | #              |
| Q60449               | Lymphocyte antigen 75                                          | LY75     | 1722           | 0.99                         | 0.99                         | 0.99                         | 9                    | 3                    | 12                   | 5                    | 17               |                |
| Q5J048               | Melanoma inhibitory activity protein 3                         | MIA3     | 907            | 0.99                         | 0.99                         | 0.99                         | 6                    | 27                   | 20                   | 27                   | 47               |                |
| ADZVJ0               | Transmembrane protein 131-like                                 | KIAA0922 | 1609           | 0.99                         | 0.99                         | 0.99                         | 6                    | 4                    | 9                    | 5                    | 14               |                |
| Q12907               | Vesicular integral-membrane protein VIP36                      | LMAN2    | 356            | 0.99                         | 1.00                         | 0.99                         | 4                    | 12                   | 9                    | 15                   | 24               | #              |
| P13674               | Prolyl 4-hydroxylase subunit alpha-1                           | P4HA1    | 534            | 0.99                         | 0.99                         | 0.99                         | 4                    | 9                    | 14                   | 11                   | 25               |                |
| Q12797               | Asparaginyl-tRNA synthetase                                    | ASPH     | 758            | 0.99                         | 0.99                         | 0.99                         | 7                    | 3                    | 8                    | 6                    | 14               |                |
| P48257               | Protein ERGIC-53                                               | LMAN1    | 510            | 0.99                         | 0.99                         | 0.99                         | 87                   | 72                   | 140                  | 105                  | 245              | #              |
| P80303               | Nucleoside 2                                                   | NUCS2    | 420            | 0.99                         | 0.99                         | 0.99                         | 6                    | 3                    | 9                    | 15                   | 23               |                |
| P05556               | Integrin beta-1                                                | ITGB1    | 798            | 0.99                         | 0.99                         | 0.99                         | 3                    | 16                   | 7                    | 22                   | 29               |                |
| Q92643               | GPI-anchor transamidase                                        | PIGK     | 395            | 0.99                         | 0.99                         | 0.99                         | 6                    | 3                    | 12                   | 4                    | 16               |                |
| O14967               | Calmeglin                                                      | CLGN     | 610            | 0.98                         | 1.00                         | 0.99                         | 35                   | 13                   | 40                   | 14                   | 54               | #              |
| Q99523               | Sorlin                                                         | SORT1    | 831            | 0.99                         | 0.99                         | 0.99                         | 17                   | 8                    | 20                   | 12                   | 32               |                |
| Q13454               | Tumor suppressor candidate 3                                   | TUSC3    | 348            | 0.99                         | 0.99                         | 0.99                         | 17                   | 12                   | 23                   | 15                   | 38               |                |
| Q9BQ19               | Calsyltin-5                                                    | CLSTN3   | 556            | 0.98                         | 0.99                         | 0.99                         | 14                   | 8                    | 21                   | 14                   | 35               |                |
| Q75787               | Renin receptor                                                 | ATP6AP2  | 350            | 0.98                         | 1.00                         | 0.99                         | 3                    | 7                    | 3                    | 8                    | 11               |                |
| P11717               | Cation-independent mannose 6-phosphate receptor                | IGF2R    | 2491           | 0.99                         | 0.99                         | 0.99                         | 27                   | 9                    | 32                   | 20                   | 52               |                |
| Q9UKU9               | Angiopoietin-related protein 2                                 | ANGPTL2  | 493            | 0.98                         | 0.99                         | 0.99                         | 20                   | 9                    | 28                   | 11                   | 39               |                |
| gp160                | gp160_Env                                                      | gp160    | 856            | 0.99                         | 0.98                         | 0.99                         | 586                  | 549                  | 2312                 | 2017                 | 4329             |                |
| Q92998               | Golgi apparatus protein 1                                      | GLG1     | 1179           | 0.99                         | 0.99                         | 0.99                         | 3                    | 3                    | 7                    | 6                    | 13               | #              |
| P07766               | T-cell surface glycoprotein CD3 epsilon chain                  | CD3E     | 207            | 0.99                         | 0.99                         | 0.99                         | 9                    | 18                   | 13                   | 24                   | 37               |                |
| Q96QV1               | Hedgehog-interacting protein                                   | HHIP     | 700            | 0.98                         | 0.99                         | 0.99                         | 8                    | 7                    | 13                   | 12                   | 25               |                |
| Q8NE01               | Metal transporter CNNM3                                        | CNNM3    | 707            | 0.98                         | 1.00                         | 0.99                         | 10                   | 3                    | 15                   | 4                    | 19               |                |
| Q8NBJ5               | Procollagen galactosyltransferase 1                            | GLT2SD1  | 622            | 0.99                         | 0.98                         | 0.99                         | 13                   | 12                   | 18                   | 19                   | 37               | #              |
| O15221               | Transmembrane 9 superfamily member 1                           | TM9SF1   | 606            | 0.98                         | 0.99                         | 0.99                         | 4                    | 8                    | 14                   | 10                   | 28               |                |
| Q8WB1                | Inositol 1,4,5-trisphosphate receptor-interacting protein      | ITPRIP   | 447            | 0.98                         | 0.99                         | 0.99                         | 4                    | 5                    | 6                    | 7                    | 13               |                |
| Q8N766               | Uncharacterized protein KIAA0900                               | KIAA0900 | 993            | 0.98                         | 1.00                         | 0.99                         | 11                   | 4                    | 18                   | 7                    | 25               | #              |
| Q13586               | Stromal interaction molecule 1                                 | STIM1    | 685            | 0.98                         | 0.99                         | 0.99                         | 3                    | 9                    | 6                    | 10                   | 16               |                |
| Q13724               | Mannosyl-oligosaccharide glucosidase                           | MOGS     | 837            | 0.99                         | 0.99                         | 0.99                         | 21                   | 18                   | 32                   | 23                   | 55               | #              |
| P30040               | Endoplasmic reticulum resident protein 29                      | ERP29    | 281            | 0.98                         | 0.99                         | 0.99                         | 15                   | 8                    | 21                   | 14                   | 35               |                |
| P14314               | Glucosidase 2 subunit beta                                     | PRKCSH   | 528            | 0.98                         | 0.99                         | 0.99                         | 57                   | 42                   | 95                   | 63                   | 158              | #              |
| Q60568               | Procollagen-lysine-2-oxoglutarate 5-dioxygenase 3              | PLOD3    | 738            | 0.98                         | 1.00                         | 0.99                         | 10                   | 5                    | 11                   | 8                    | 19               |                |
| P04234               | T-cell surface glycoprotein CD3 delta chain                    | CD3D     | 171            | 0.98                         | 0.99                         | 0.99                         | 6                    | 11                   | 10                   | 22                   | 32               | #              |
| P27524               | Calnexin                                                       | CANX     | 592            | 0.98                         | 0.99                         | 0.99                         | 140                  | 138                  | 255                  | 165                  | 420              | #              |
| P13667               | Protein disulfide-isomerase A4                                 | PDI4A    | 645            | 0.99                         | 0.99                         | 0.99                         | 35                   | 46                   | 59                   | 73                   | 132              | #              |
| Q9Y6M0               | Testisin                                                       | PRSS21   | 314            | 0.99                         | 0.98                         | 0.99                         | 20                   | 13                   | 26                   | 17                   | 43               |                |
| P01850               | T-cell receptor beta-1 chain C region                          | TRBC1    | 177            | 0.99                         | 0.98                         | 0.99                         | 22                   | 11                   | 29                   | 17                   | 46               | #              |
| Q8NFQ8               | Torsin-1A-interacting protein 2                                | TOR1AIP2 | 670            | 0.98                         | 0.98                         | 0.98                         | 13                   | 17                   | 23                   | 24                   | 47               | #              |
| Q9BRK5               | 45 kDa calcium-binding protein                                 | SDF4     | 362            | 0.98                         | 0.99                         | 0.99                         | 6                    | 9                    | 7                    | 9                    | 16               | #              |
| Q9H0U3               | Magnesium transporter protein 1                                | MAGT1    | 335            | 0.98                         | 0.98                         | 0.98                         | 26                   | 28                   | 42                   | 36                   | 78               | #              |
| P46531               | Neurogenic locus notch homolog protein 1                       | NOTCH1   | 2555           | 0.97                         | 0.98                         | 0.98                         | 17                   | 7                    | 32                   | 11                   | 43               |                |
| Q9H173               | Nucleotide exchange factor SIL1                                | SIL1     | 461            | 0.97                         | 1.00                         | 0.98                         | 4                    | 4                    | 6                    | 5                    | 11               |                |
| Q9H3N1               | Thioredoxin-related transmembrane protein 1                    | TXM1     | 280            | 0.99                         | 0.97                         | 0.98                         | 57                   | 34                   | 98                   | 54                   | 188              |                |
| P07237               | Protein disulfide-isomerase                                    | P4HB     | 508            | 0.98                         | 0.98                         | 0.98                         | 99                   | 110                  | 162                  | 147                  | 309              | #              |
| Q93063               | Exostosin-2                                                    | EXT2     | 718            | 0.99                         | 0.97                         | 0.98                         | 20                   | 4                    | 25                   | 5                    | 30               |                |
| Q9BYC5               | Alpha-(1,6)-fucosyltransferase                                 | FUT8     | 575            | 0.99                         | 0.96                         | 0.98                         | 16                   | 12                   | 32                   | 18                   | 50               | #              |
| P49755               | Transmembrane epsilon24 domain-containing protein 10           | TMED10   | 427            | 0.97                         | 0.99                         | 0.98                         | 25                   | 17                   | 42                   | 16                   | 46               |                |
| Q9UJH9               | SUN domain-containing protein 2                                | SUN2     | 717            | 0.98                         | 0.97                         | 0.98                         | 40                   | 30                   | 62                   | 46                   | 108              |                |
| P00387               | NADH-cytochrome b5 reductase 3                                 | CYB5R3   | 301            | 0.97                         | 0.98                         | 0.98                         | 3                    | 5                    | 5                    | 8                    | 13               |                |
| P23229               | Integrin alpha-6                                               | ITGA6    | 1130           | 0.99                         | 0.96                         | 0.98                         | 12                   | 8                    | 20                   | 11                   | 31               |                |
| Q94921               | SUN domain-containing protein 1                                | SUN1     | 812            | 0.98                         | 0.97                         | 0.97                         | 40                   | 37                   | 69                   | 43                   | 143              | #              |
| Q9BTV4               | Transmembrane protein 43                                       | TMEM43   | 400            | 0.96                         | 0.99                         | 0.97                         | 4                    | 7                    | 5                    | 10                   | 15               | #              |
| Q9P2E5               | Chondroitin sulfate glucuronyltransferase                      | CHPF2    | 772            | 0.99                         | 0.96                         | 0.97                         | 20                   | 5                    | 33                   | 8                    | 41               |                |
| P11021               | 78 kDa glucose-regulated protein                               | HSPA5    | 654            | 0.97                         | 0.97                         | 0.97                         | 70                   | 79                   | 129                  | 143                  | 272              |                |
| P04843               | Dolichyl-diphosphooligosaccharide glycosyltransferase          | RPN1     | 607            | 0.97                         | 0.97                         | 0.97                         | 102                  | 100                  | 159                  | 135                  | 294              | #              |
| Q9SL4                | Glutathione peroxidase 7                                       | GPX7     | 187            | 0.95                         | 0.95                         | 0.97                         | 9                    | 11                   | 9                    | 14                   | 23               |                |
| P27797               | Calreticulin                                                   | CALR     | 417            | 0.96                         | 0.98                         | 0.97                         | 44                   | 67                   | 67                   | 140                  | 207              |                |
| Q9HEH7               | ERO1-like protein alpha                                        | ERO1L    | 468            | 0.99                         | 0.95                         | 0.97</                       |                      |                      |                      |                      |                  |                |

| UNIPROT ACCESSION | DESCRIPTION                                               | GENE     | LENGTH (AA) | IDIRT SPECIFICITY FORWARD | IDIRT SPECIFICITY REVERSE | IDIRT SPECIFICITY AVERAGE | QUANT PSM FORWARD | QUANT PSM REVERSE | TOTAL PSM FORWARD | TOTAL PSM REVERSE | TOTAL PSM SUM | JAGER et al |
|-------------------|-----------------------------------------------------------|----------|-------------|---------------------------|---------------------------|---------------------------|-------------------|-------------------|-------------------|-------------------|---------------|-------------|
| Q32P28            | Prolyl 3-hydroxylase 1                                    | LEPRE1   | 736         | 0.88                      | 0.99                      | 0.94                      | 6                 | 8                 | 11                | 9                 | 20            |             |
| Q969N2            | GPI transamidase component PIG-T                          | PIGT     | 578         | 0.95                      | 0.93                      | 0.94                      | 6                 | 6                 | 14                | 10                | 24            |             |
| Q9NYU2            | UDP-glucose:glycoprotein glucosyltransferase 1            | UGGT1    | 1555        | 0.95                      | 0.93                      | 0.94                      | 57                | 32                | 82                | 48                | 130           | #           |
| Q96RQ1            | Endoplasmic reticulum-Golgi intermediate compartment 2    | ERGIC2   | 377         | 0.88                      | 0.99                      | 0.94                      | 3                 | 4                 | 6                 | 5                 | 11            | #           |
| O43852            | Calumenin                                                 | CALLU    | 315         | 0.98                      | 0.88                      | 0.93                      | 7                 | 11                | 8                 | 16                | 24            | #           |
| P31785            | Cytokine receptor common subunit gamma                    | IL2RG    | 369         | 0.94                      | 0.92                      | 0.93                      | 6                 | 3                 | 11                | 3                 | 14            |             |
| Q9BU23            | Lipase maturation factor 2                                | LMF2     | 707         | 0.90                      | 0.95                      | 0.93                      | 5                 | 3                 | 9                 | 4                 | 13            |             |
| Q8NBS9            | Thioredoxin domain-containing protein 5                   | TXNDC5   | 432         | 0.91                      | 0.94                      | 0.93                      | 10                | 10                | 15                | 11                | 26            | #           |
| Q9NTJ5            | Phosphatidylinositol phosphatase SAC1                     | SACM1L   | 587         | 0.95                      | 0.90                      | 0.93                      | 17                | 16                | 26                | 28                | 54            |             |
| P51149            | Ras-related protein Rab-7a                                | RAB7A    | 207         | 0.93                      | 0.92                      | 0.92                      | 4                 | 14                | 6                 | 21                | 27            |             |
| Q9UBV2            | Protein sel-1 homolog 1                                   | SEL1L    | 794         | 0.92                      | 0.93                      | 0.92                      | 18                | 10                | 30                | 19                | 49            | #           |
| Q9BX59            | TAPasin-related protein                                   | TAPBPL   | 468         | 0.99                      | 0.83                      | 0.91                      | 10                | 3                 | 14                | 4                 | 18            |             |
| P04844            | Dolichyl-diphosphooligosaccharide glycosyltransferase 2   | RPN2     | 631         | 0.92                      | 0.90                      | 0.91                      | 37                | 24                | 73                | 35                | 108           |             |
| P12208            | Inosine-5'-monophosphate dehydrogenase 2                  | IMPDH2   | 514         | 0.91                      | 0.91                      | 0.91                      | 11                | 9                 | 19                | 16                | 35            |             |
| P43307            | Translocon-associated protein subunit alpha               | SSR1     | 286         | 0.95                      | 0.87                      | 0.91                      | 6                 | 5                 | 8                 | 8                 | 16            |             |
| Q99519            | Sialidase-1                                               | NEU1     | 415         | 0.89                      | 0.92                      | 0.91                      | 4                 | 3                 | 5                 | 5                 | 10            |             |
| Q15392            | 24-dehydrocholesterol reductase                           | DHCR24   | 516         | 0.86                      | 0.95                      | 0.90                      | 24                | 10                | 32                | 16                | 48            | #           |
| O95573            | Long-chain-fatty-acid-CoA ligase 3                        | ACSL3    | 720         | 0.90                      | 0.90                      | 0.90                      | 21                | 5                 | 39                | 15                | 54            |             |
| P37268            | Squalene synthase                                         | FDFT1    | 417         | 0.92                      | 0.88                      | 0.90                      | 19                | 8                 | 35                | 18                | 53            |             |
| Q9BSJ8            | Extended synaptotagmin-1                                  | ESYT1    | 1104        | 0.95                      | 0.85                      | 0.90                      | 16                | 16                | 24                | 22                | 46            |             |
| O95870            | Protein BAT5                                              | BAT5     | 558         | 0.88                      | 0.90                      | 0.89                      | 6                 | 5                 | 10                | 8                 | 18            |             |
| Q96GQ5            | UPF0420 protein C16orf58                                  | C16orf58 | 468         | 0.86                      | 0.91                      | 0.89                      | 6                 | 4                 | 12                | 6                 | 18            |             |
| Q96031            | PRA1 family protein 2                                     | PRA1F2   | 178         | 0.87                      | 0.87                      | 0.87                      | 8                 | 8                 | 9                 | 15                | 24            |             |
| O75718            | Cartilage-associated protein                              | CRTP     | 401         | 0.83                      | 0.91                      | 0.87                      | 4                 | 3                 | 7                 | 5                 | 12            |             |
| Q9Y5M8            | Signal recognition particle receptor subunit beta         | SRPRB    | 271         | 0.89                      | 0.85                      | 0.87                      | 9                 | 19                | 14                | 28                | 42            |             |
| P61026            | Ras-related protein Rab-10                                | RAB10    | 200         | 0.87                      | 0.87                      | 0.87                      | 3                 | 6                 | 11                | 20                | 31            |             |
| P55072            | Transitional endoplasmic reticulum ATPase                 | VCP      | 806         | 0.90                      | 0.84                      | 0.87                      | 14                | 13                | 22                | 20                | 42            | #           |
| Q8TC12            | Retinol dehydrogenase 11                                  | RDH11    | 818         | 0.88                      | 0.85                      | 0.87                      | 4                 | 8                 | 9                 | 11                | 20            |             |
| Q6DD88            | Atlastin-3                                                | ATL3     | 541         | 0.81                      | 0.82                      | 0.86                      | 19                | 15                | 26                | 24                | 50            | #           |
| P02786            | Transferrin receptor protein 1                            | TFR3     | 780         | 0.84                      | 0.87                      | 0.86                      | 77                | 37                | 137               | 60                | 197           |             |
| O00231            | 26S proteasome non-ATPase regulatory subunit 11           | PSMD11   | 422         | 0.85                      | 0.86                      | 0.85                      | 3                 | 3                 | 7                 | 6                 | 13            | #           |
| O43736            | Integral membrane protein 2A                              | ITM2A    | 263         | 0.85                      | 0.85                      | 0.85                      | 10                | 12                | 19                | 18                | 37            |             |
| Q15084            | Protein disulfide-isomerase A6                            | PDI6A    | 440         | 0.78                      | 0.92                      | 0.85                      | 5                 | 11                | 12                | 16                | 28            |             |
| P49411            | Elongation factor Tu, mitochondrial                       | TUFM     | 452         | 0.80                      | 0.91                      | 0.85                      | 13                | 6                 | 20                | 8                 | 28            |             |
| P51571            | Translocon-associated protein subunit delta               | SSR4     | 173         | 0.84                      | 0.86                      | 0.85                      | 3                 | 9                 | 3                 | 15                | 18            | #           |
| Q9UNM6            | 26S proteasome non-ATPase regulatory subunit 13           | PSMD13   | 376         | 0.82                      | 0.87                      | 0.84                      | 5                 | 5                 | 8                 | 6                 | 14            |             |
| Q96KA5            | Cleft lip and palate transmembrane protein 1-like protein | CLPTM1L  | 538         | 0.80                      | 0.88                      | 0.84                      | 14                | 9                 | 22                | 17                | 39            |             |
| P51148            | Ras-related protein Rab-5C                                | RAB5C    | 216         | 0.84                      | 0.83                      | 0.84                      | 3                 | 6                 | 8                 | 15                | 23            |             |
| O75396            | Vesicle-trafficking protein SEC22b                        | SEC22B   | 215         | 0.84                      | 0.83                      | 0.84                      | 3                 | 8                 | 5                 | 12                | 17            |             |
| P61106            | Ras-related protein Rab-14                                | RAB14    | 215         | 0.83                      | 0.83                      | 0.83                      | 3                 | 8                 | 6                 | 14                | 20            |             |
| Q9Y282            | Endoplasmic reticulum-Golgi intermediate compartment 3    | ERGIC3   | 383         | 0.80                      | 0.85                      | 0.82                      | 11                | 9                 | 17                | 11                | 28            | #           |
| Q8TCT9            | Minor histocompatibility antigen H13                      | HM13     | 377         | 0.72                      | 0.93                      | 0.82                      | 12                | 6                 | 17                | 16                | 33            | #           |
| O00299            | Chloride intracellular channel protein 1                  | CLIC1    | 241         | 0.84                      | 0.78                      | 0.81                      | 5                 | 9                 | 6                 | 16                | 22            |             |
| Q8WUM0            | Nuclear pore complex protein Nup133                       | NUP133   | 1156        | 0.80                      | 0.82                      | 0.81                      | 3                 | 4                 | 6                 | 7                 | 13            |             |
| Q6P1A2            | Lysophospholipid acyltransferase 5                        | LPCAT3   | 487         | 0.89                      | 0.71                      | 0.80                      | 8                 | 3                 | 14                | 5                 | 19            |             |
| P13489            | Ribonuclease inhibitor                                    | RNH1     | 461         | 0.75                      | 0.86                      | 0.80                      | 9                 | 8                 | 17                | 13                | 30            |             |
| Q93084            | Sarcoplasmic/endoplasmic reticulum calcium ATPase 3       | ATP2A3   | 1043        | 0.78                      | 0.80                      | 0.79                      | 21                | 8                 | 101               | 48                | 149           | #           |
| P50402            | Emerin                                                    | EMD      | 254         | 0.82                      | 0.76                      | 0.79                      | 5                 | 7                 | 9                 | 9                 | 18            |             |
| Q03519            | Antigen peptide transporter 2                             | TAP2     | 686         | 0.87                      | 0.71                      | 0.79                      | 4                 | 3                 | 7                 | 5                 | 12            |             |
| Q99460            | 26S proteasome non-ATPase regulatory subunit 1            | PSMD1    | 953         | 0.76                      | 0.81                      | 0.79                      | 5                 | 5                 | 7                 | 5                 | 12            |             |
| Q9BVC6            | Transmembrane protein 109                                 | TMEM109  | 243         | 0.83                      | 0.74                      | 0.79                      | 3                 | 3                 | 6                 | 4                 | 10            |             |
| P00558            | Phosphoglycerate kinase 1                                 | PGK1     | 417         | 0.79                      | 0.77                      | 0.78                      | 3                 | 4                 | 9                 | 13                | 22            |             |
| Q9BZF1            | Oxysterol-binding protein-related protein 8               | OSBPL8   | 889         | 0.86                      | 0.70                      | 0.78                      | 3                 | 3                 | 5                 | 5                 | 10            |             |
| Q9UBM7            | 7-dehydrocholesterol reductase                            | DHCR7    | 475         | 0.74                      | 0.80                      | 0.77                      | 23                | 15                | 36                | 28                | 64            |             |
| P17980            | 26S protease regulatory subunit 6A                        | PSMC3    | 439         | 0.77                      | 0.76                      | 0.76                      | 7                 | 4                 | 10                | 5                 | 15            |             |
| Q53GQ0            | Estradiol 17-beta-dehydrogenase 12                        | HSD17B12 | 312         | 0.67                      | 0.85                      | 0.76                      | 4                 | 9                 | 8                 | 13                | 21            |             |
| P35606            | Cotatomer subunit beta                                    | COPB2    | 906         | 0.81                      | 0.70                      | 0.76                      | 10                | 7                 | 17                | 12                | 29            |             |
| P16615            | Sarcoplasmic/endoplasmic reticulum calcium ATPase 2       | ATP2A2   | 1042        | 0.75                      | 0.76                      | 0.75                      | 78                | 56                | 198               | 123               | 321           | #           |
| P62491            | Ras-related protein Rab-11A                               | RAB11A   | 216         | 0.77                      | 0.72                      | 0.75                      | 4                 | 6                 | 6                 | 11                | 17            |             |
| P20700            | Lamin-B1                                                  | LMBN1    | 586         | 0.77                      | 0.72                      | 0.75                      | 23                | 37                | 51                | 72                | 123           |             |
| Q13200            | 26S proteasome non-ATPase regulatory subunit 2            | PSMD2    | 908         | 0.74                      | 0.75                      | 0.74                      | 16                | 15                | 22                | 25                | 47            |             |
| Q9Y265            | RuvB-like 1                                               | RUVBL1   | 456         | 0.71                      | 0.77                      | 0.74                      | 11                | 12                | 17                | 19                | 36            |             |
| Q969X5            | Endoplasmic reticulum-Golgi intermediate compartment 1    | ERGIC1   | 290         | 0.71                      | 0.76                      | 0.74                      | 3                 | 4                 | 8                 | 8                 | 16            |             |
| Q6P179            | Endoplasmic reticulum aminopeptidase 2                    | ERAP2    | 960         | 0.80                      | 0.67                      | 0.74                      | 11                | 6                 | 16                | 12                | 28            |             |
| P08575            | Receptor-type tyrosine-protein phosphatase C              | PTPRC    | 1304        | 0.74                      | 0.73                      | 0.73                      | 48                | 59                | 89                | 102               | 191           |             |
| P0C447            | Polyubiquitin-B                                           | UBB      | 229         | 0.79                      | 0.66                      | 0.72                      | 35                | 45                | 67                | 83                | 150           |             |
| P15153            | Ras-related C3 botulinum toxin substrate 2                | RAC2     | 192         | 0.73                      | 0.72                      | 0.72                      | 4                 | 8                 | 9                 | 19                | 28            |             |
| P50990            | T-complex protein 1 subunit theta                         | CCT8     | 548         | 0.81                      | 0.63                      | 0.72                      | 3                 | 8                 | 9                 | 17                | 26            |             |
| Q96DZ1            | Endoplasmic reticulum lectin 1                            | ERLEC1   | 483         | 0.73                      | 0.71                      | 0.72                      | 17                | 10                | 30                | 18                | 48            | #           |
| Q9Y230            | RuvB-like 2                                               | RUVBL2   | 463         | 0.71                      | 0.73                      | 0.72                      | 11                | 12                | 21                | 16                | 37            |             |

**Supplementary Table 1b. Env host interactions: list of proteins classified as specific Env interactions by I-DIRT proteomic analysis.** Proteins are listed in order of descending I-DIRT specificity ratios, along with the following columns (from left to right): accession/identifier, protein description, gene, protein length in amino acids, I-DIRT specificity in forward and reverse experiments, average I-DIRT specificity, number of peptide spectrum matches (PSM) used for quantification in forward and reverse experiments, total peptide spectrum matches (PSM) in forward and reverse, the sum of peptide spectrum matches and those host proteins (hashtag) jointly identified by Jäger et al.



| UNIPROT ACCESSION | DESCRIPTION                                                | GENE     | LENGTH (AA) | IDIRT SPECIFICITY FORWARD | IDIRT SPECIFICITY REVERSE | IDIRT SPECIFICITY AVERAGE | QUANT PSM FORWARD | QUANT PSM REVERSE | TOTAL PSM FORWARD | TOTAL PSM REVERSE | TOTAL PSM SUM | JÄGER et al |
|-------------------|------------------------------------------------------------|----------|-------------|---------------------------|---------------------------|---------------------------|-------------------|-------------------|-------------------|-------------------|---------------|-------------|
| Vf3FLAG           | Vif with 3xFLAG insertion                                  | Vif      | 227         | 1.00                      | 0.99                      | 1.00                      | 81                | 81                | 909               | 974               | 1883          |             |
| Q13951            | Core-binding factor subunit beta                           | CBFB     | 182         | 1.00                      | 0.99                      | 0.99                      | 71                | 78                | 349               | 305               | 654           |             |
| Q2KJY2            | Kinesin-like protein KIF26B                                | KIF26B   | 2108        | 0.99                      | 1.00                      | 0.99                      | 9                 | 5                 | 16                | 11                | 27            | #           |
| Q43847            | Nardilysin                                                 | NRD1     | 1150        | 0.98                      | 1.00                      | 0.99                      | 12                | 5                 | 25                | 9                 | 34            |             |
| Q99707            | Methionine synthase                                        | MTR      | 1265        | 0.98                      | 1.00                      | 0.99                      | 28                | 37                | 60                | 53                | 113           |             |
| Q86YV9            | Hermansky-Pudlak syndrome 6 protein                        | HPS6     | 775         | 0.96                      | 1.00                      | 0.98                      | 7                 | 3                 | 15                | 8                 | 23            |             |
| Pol               | Pol polyprotein                                            | Pol      | 1003        | 0.97                      | 0.96                      | 0.96                      | 108               | 35                | 218               | 88                | 306           |             |
| Q01113            | Interleukin-9 receptor                                     | IL9R     | 521         | 0.93                      | 0.98                      | 0.96                      | 18                | 4                 | 44                | 23                | 67            |             |
| P46379            | Large proline-rich protein BAT3                            | BAT3     | 1132        | 0.91                      | 1.00                      | 0.95                      | 8                 | 4                 | 15                | 12                | 27            | #           |
| P61221            | ATP-binding cassette sub-family E member 1                 | ABCE1    | 599         | 0.96                      | 0.95                      | 0.95                      | 5                 | 6                 | 10                | 21                | 31            |             |
| P08107            | Heat shock 70 kDa protein 1A/1B                            | HSPA1A   | 841         | 0.96                      | 0.94                      | 0.95                      | 9                 | 9                 | 97                | 86                | 183           |             |
| Q90C07            | Activating molecule in BECN1-regulated autophagy protein 1 | AMBRA1   | 1298        | 0.94                      | 0.97                      | 0.95                      | 65                | 38                | 170               | 80                | 250           | #           |
| Q6F5E8            | Leucine-rich repeat-containing protein 16C                 | RLTPR    | 1435        | 0.94                      | 0.96                      | 0.95                      | 10                | 5                 | 23                | 10                | 33            |             |
| Q575P2            | Sickle tail protein homolog                                | SKT      | 1943        | 0.89                      | 1.00                      | 0.94                      | 9                 | 4                 | 21                | 17                | 38            |             |
| P11142            | Heat shock cognate 71 kDa protein                          | HSPA8    | 646         | 0.93                      | 0.93                      | 0.93                      | 105               | 107               | 720               | 686               | 1406          |             |
| P30876            | DNA-directed RNA polymerase II subunit RPB2                | POLR2B   | 1174        | 0.94                      | 0.91                      | 0.93                      | 35                | 26                | 48                | 41                | 89            |             |
| Q16531            | DNA damage-binding protein 1                               | DDB1     | 1140        | 0.90                      | 0.93                      | 0.91                      | 71                | 52                | 149               | 102               | 251           |             |
| Q15369            | Transcription elongation factor B polypeptide 1            | TCEB1    | 112         | 0.88                      | 0.94                      | 0.91                      | 22                | 28                | 90                | 102               | 192           | #           |
| P04792            | Heat shock protein beta-1                                  | HSPB1    | 205         | 0.89                      | 0.92                      | 0.91                      | 13                | 17                | 43                | 66                | 109           |             |
| P10809            | 60 kDa heat shock protein                                  | HSPD1    | 573         | 0.90                      | 0.90                      | 0.90                      | 79                | 55                | 236               | 233               | 469           |             |
| P40227            | T-complex protein 1 subunit zeta                           | CCT6A    | 531         | 0.90                      | 0.91                      | 0.90                      | 15                | 11                | 29                | 24                | 53            |             |
| Q6UB35            | Monofunctional C1-tetrahydrofolate synthase, mitochondrial | MTHFD1L  | 978         | 0.92                      | 0.88                      | 0.90                      | 29                | 12                | 71                | 52                | 123           |             |
| P35869            | Aryl hydrocarbon receptor                                  | AHR      | 848         | 0.85                      | 0.94                      | 0.89                      | 10                | 8                 | 18                | 17                | 35            |             |
| Q15370            | Transcription elongation factor B polypeptide 2            | TCEB2    | 118         | 0.86                      | 0.92                      | 0.89                      | 29                | 21                | 123               | 96                | 219           | #           |
| P78371            | T-complex protein 1 subunit beta                           | CCT2     | 535         | 0.89                      | 0.88                      | 0.89                      | 15                | 11                | 26                | 14                | 40            |             |
| P50990            | T-complex protein 1 subunit theta                          | CCT8     | 548         | 0.87                      | 0.90                      | 0.89                      | 28                | 10                | 50                | 24                | 74            |             |
| Q15067            | Phosphoribosylformylglycinamide synthase                   | PFAS     | 1338        | 0.80                      | 0.97                      | 0.88                      | 7                 | 3                 | 14                | 7                 | 21            |             |
| Q98832            | T-complex protein 1 subunit eta                            | CCT7     | 543         | 0.91                      | 0.85                      | 0.88                      | 15                | 12                | 26                | 24                | 50            |             |
| P48643            | T-complex protein 1 subunit epsilon                        | CCT5     | 541         | 0.87                      | 0.89                      | 0.88                      | 18                | 14                | 33                | 31                | 64            |             |
| P52732            | Kinesin-like protein KIF11                                 | KIF11    | 1056        | 0.93                      | 0.83                      | 0.88                      | 4                 | 7                 | 9                 | 12                | 21            |             |
| P50991            | T-complex protein 1 subunit delta                          | CCT4     | 539         | 0.86                      | 0.89                      | 0.88                      | 17                | 16                | 41                | 36                | 77            |             |
| Q72627            | E3 ubiquitin-protein ligase HUWE1                          | HUWE1    | 4374        | 0.85                      | 0.90                      | 0.88                      | 53                | 35                | 124               | 75                | 199           | #           |
| P27708            | CAD protein                                                | CAD      | 2225        | 0.83                      | 0.92                      | 0.87                      | 57                | 42                | 142               | 91                | 233           |             |
| Q13785            | Nascent polypeptide-associated complex subunit alpha       | NACA     | 215         | 0.84                      | 0.91                      | 0.87                      | 5                 | 3                 | 9                 | 7                 | 16            |             |
| P49368            | T-complex protein 1 subunit gamma                          | CCT3     | 545         | 0.88                      | 0.86                      | 0.87                      | 24                | 11                | 44                | 29                | 73            |             |
| Q5V442            | CDK5 regulatory subunit-associated protein 1-like 1        | CDKAL1   | 579         | 0.80                      | 0.93                      | 0.86                      | 4                 | 4                 | 8                 | 7                 | 15            |             |
| P40939            | Trifunctional enzyme subunit alpha, mitochondrial          | HADHA    | 763         | 0.86                      | 0.86                      | 0.86                      | 13                | 5                 | 33                | 14                | 47            |             |
| P49327            | Fatty acid synthase                                        | FASN     | 2511        | 0.85                      | 0.86                      | 0.86                      | 49                | 20                | 102               | 54                | 156           |             |
| P24928            | DNA-directed RNA polymerase II subunit RPB1                | POLR2A   | 1970        | 0.94                      | 0.77                      | 0.85                      | 13                | 9                 | 23                | 25                | 48            |             |
| P17987            | T-complex protein 1 subunit alpha                          | TCP1     | 556         | 0.82                      | 0.88                      | 0.85                      | 23                | 12                | 41                | 33                | 74            |             |
| Q60884            | DnaJ homolog subfamily A member 2                          | DNAJA2   | 412         | 0.80                      | 0.89                      | 0.84                      | 11                | 5                 | 34                | 31                | 65            |             |
| Q9NSE4            | Isoeuclyt-IRNA synthetase, mitochondrial                   | IARS2    | 1012        | 0.83                      | 0.86                      | 0.84                      | 11                | 5                 | 19                | 8                 | 27            |             |
| P46821            | Microtubule-associated protein 1B                          | MAP1B    | 2468        | 0.77                      | 0.91                      | 0.84                      | 8                 | 6                 | 33                | 26                | 59            |             |
| P22102            | Trifunctional purine biosynthetic protein adenosine-3      | GART     | 1010        | 0.74                      | 0.94                      | 0.84                      | 7                 | 5                 | 14                | 11                | 25            |             |
| Q8N163            | Protein KIAA1967                                           | KIAA1967 | 923         | 0.72                      | 0.95                      | 0.83                      | 11                | 3                 | 22                | 6                 | 28            |             |
| Q5SW79            | Centrosomal protein of 170 kDa                             | CEP170   | 1584        | 0.81                      | 0.84                      | 0.82                      | 6                 | 3                 | 13                | 5                 | 18            |             |
| P07900            | Heat shock protein HSP 90-alpha                            | HSP90AA1 | 732         | 0.82                      | 0.83                      | 0.82                      | 8                 | 5                 | 186               | 118               | 304           |             |
| Q9UKT9            | Zinc finger protein Aiolos                                 | IKZF3    | 509         | 0.84                      | 0.80                      | 0.82                      | 11                | 5                 | 22                | 13                | 35            |             |
| P02786            | Transferrin receptor protein 1                             | TFR1     | 760         | 0.78                      | 0.85                      | 0.82                      | 13                | 3                 | 31                | 14                | 45            |             |
| Q95831            | Apoptosis-inducing factor 1, mitochondrial                 | AIFM1    | 613         | 0.78                      | 0.84                      | 0.81                      | 15                | 9                 | 32                | 17                | 49            |             |
| Q9NNW5            | WD repeat-containing protein 6                             | WDR6     | 1121        | 0.80                      | 0.83                      | 0.81                      | 7                 | 3                 | 12                | 10                | 22            |             |
| P31689            | DnaJ homolog subfamily A member 1                          | DNAJA1   | 397         | 0.78                      | 0.83                      | 0.81                      | 19                | 13                | 77                | 48                | 125           |             |
| Pr55              | Gag Pr55 Gag precursor (Assemblin)                         | Pr55     | 500         | 0.82                      | 0.79                      | 0.81                      | 73                | 37                | 170               | 129               | 299           |             |
| Q08AF3            | Schlafen family member 5                                   | SLFN5    | 891         | 0.71                      | 0.90                      | 0.81                      | 5                 | 3                 | 20                | 11                | 31            |             |
| Q75616            | GTP-binding protein era homolog                            | ERAL1    | 437         | 0.76                      | 0.85                      | 0.80                      | 5                 | 4                 | 6                 | 7                 | 13            |             |
| Q13617            | Cullin-2                                                   | CUL2     | 745         | 0.65                      | 0.89                      | 0.77                      | 65                | 43                | 156               | 121               | 277           | #           |

**Supplementary Table 2. Vif host and viral interactions: list of proteins classified as specific Vif interactions by I-DIRT proteomic analysis.** Proteins are listed in order of descending I-DIRT specificity ratios, along with the following columns (from left to right): accession/identifier, protein description, gene, protein length in amino acids, I-DIRT specificity in forward and reverse experiments, average I-DIRT specificity, number of peptide spectrum matches (PSM) used for quantification in forward and reverse experiments, total peptide spectrum matches (PSM) in forward and reverse, the sum of peptide spectrum matches and those host proteins (hashtag) jointly identified by Jäger et al.
